1 Full title:

2 Guanosine-specific single-stranded ribonuclease effectors of a phytopathogenic fungus  
3 potentiate host immune responses

4

5 Authors:

6 Naoyoshi Kumakura<sup>1</sup>, Suthitar Singkaravanit-Ogawa<sup>2</sup>, Pamela Gan<sup>1</sup>, Ayako  
7 Tsushima<sup>1,6</sup>, Nobuaki Ishihama<sup>1</sup>, Shunsuke Watanabe<sup>1</sup>, Mitsunori Seo<sup>1</sup>, Shintaro  
8 Iwasaki<sup>3,4</sup>, Mari Narusaka<sup>5</sup>, Yoshihiro Narusaka<sup>5</sup>, Yoshitaka Takano<sup>2</sup>, Ken Shirasu<sup>1,6\*</sup>

9

10 Affiliations:

11 <sup>1</sup>RIKEN Center for Sustainable Resource Science, Kanagawa, Japan

12 <sup>2</sup>Graduate School of Agriculture, Kyoto University, Kyoto, Japan

13 <sup>3</sup>RIKEN Cluster for Pioneering Research, Saitama, Japan

14 <sup>4</sup>Graduate School of Frontier Sciences, The University of Tokyo, Chiba, Japan

15 <sup>5</sup>Okayama Prefectural Technology Center for Agriculture, Forestry, and Fisheries,

16 Research Institute for Biological Sciences, Okayama, Japan

17 <sup>6</sup>Graduate School of Science, The University of Tokyo, Tokyo, Japan

18

19 \*Corresponding author:

20 Ken Shirasu

21 Telephone: +81-45-503-9574

22 E-mail: [ken.shirasu@riken.jp](mailto:ken.shirasu@riken.jp)

23

24

## 25 **Summary**

26 Plants activate immunity upon recognition of pathogen-associated molecular patterns.  
27 Although phytopathogens have evolved a set of effector proteins to counteract plant  
28 immunity, some effectors are perceived by hosts and induce immune responses. Here,  
29 we show that two secreted ribonuclease effectors, SRN1 and SRN2, encoded in a  
30 phytopathogenic fungus, *Colletotrichum orbiculare*, induce cell death in a signal  
31 peptide- and catalytic residue-dependent manner, when transiently expressed in  
32 *Nicotiana benthamiana*. The pervasive presence of *SRN* genes across *Colletotrichum*  
33 species suggested the conserved roles. Using a transient gene expression system in  
34 cucumber (*Cucumis sativus*), an original host of *C. orbiculare*, we show that SRN1 and  
35 SRN2 potentiate host pattern-triggered immunity. Consistent with this, *C. orbiculare*  
36 SRN1 and SRN2 deletion mutants exhibited increased virulence on the host. In vitro  
37 analysis revealed that SRN1 specifically cleaves single-stranded RNAs at guanosine,  
38 leaving a 3'-end phosphate. This activity has not been reported in plants. Importantly,  
39 the potentiation of *C. sativus* responses by SRN1 and SRN2 depends on the signal  
40 peptide and ribonuclease catalytic residues, suggesting that secreted SRNs cleave RNAs  
41 in apoplast and are detected by the host. We propose that the pathogen-derived  
42 apoplastic guanosine-specific single-stranded endoribonucleases lead to immunity  
43 potentiation in plants.

44

45 **Key words:** *Colletotrichum orbiculare*, effector, ribonuclease, plant immunity,  
46 pathogen-associated molecular pattern (PAMP), pattern-triggered immunity (PTI)

47

## 48 **Introduction**

49 Plants and phytopathogens have developed mutual attack and defense systems over  
50 millions of years of coevolution. Plants are able to recognize pathogens through cell  
51 surface-localized pattern recognition receptors (PRRs). PRRs are able to perceive  
52 broadly conserved pathogen-associated molecular patterns (PAMPs), as well as  
53 damage-associated molecular patterns (DAMPs) that are host plant-derived molecules  
54 generated during pathogen invasion or cell damage. PAMPs and DAMPs include  
55 proteins, lipids, carbohydrates, and nucleic acids. Direct or indirect PAMPs/DAMPs

56 perception by PRRs induce pattern triggered-immunity (PTI), which includes both local  
57 and systemic immune responses (Boutrot & Zipfel, 2017).

58 To counteract plant immune systems, pathogens have evolved secreted proteins,  
59 referred to as effectors, that inhibit host immune responses and allow pathogens to  
60 establish infection (Win *et al.*, 2012). However, some effectors or their functions are  
61 recognized by host PRRs and induce immune responses. For example, the presence of  
62 Avr2, an effector protein of *Cladosporium fluvum*, is indirectly recognized by Cf-2, a  
63 PRR of tomato, and induces an immune response. Avr2 is secreted out from *C. fluvum*  
64 into the host apoplastic region, binds to Rcr3, a host plant-derived protease, and inhibits  
65 its enzymatic activity. Tomato indirectly senses Avr2 probably by detecting the  
66 modification of Rcr3 via Cf-2 and induces an immune response to inhibit *C. fluvum*  
67 infection (Dixon *et al.*, 2000; Rooney *et al.*, 2005; Tang *et al.*, 2017). Thus, effectors  
68 can cause both positive and negative effects on the establishment of infection. However,  
69 the mechanistic diversity of effector recognition by host PRRs is largely unknown.

70 *Colletotrichum* species are fungal pathogens that cause anthracnose disease on  
71 a variety of plants including economically important crops, fruits, and vegetables (Dean  
72 *et al.*, 2012; Cannon *et al.*, 2012). Most *Colletotrichum* species adopt a hemibiotroph  
73 lifestyle, consisting of an early biotrophic phase with no visible symptoms and a later  
74 necrotrophic phase associated with host cell death. Due to the agricultural and scientific  
75 importance of *Colletotrichum* species, genome sequencing of these fungi has been  
76 performed (O'Connell *et al.*, 2012; Gan *et al.*, 2013, 2016, 2021; Baroncelli *et al.*, 2014,  
77 2016; Hacquard *et al.*, 2016; Tsushima *et al.*, 2019).

78 Several *Colletotrichum* effectors have been identified. For example, NIS1  
79 from *Colletotrichum orbiculare*, a causal agent of Cucurbitaceae anthracnose disease,  
80 suppresses PTI by inhibiting plant immunity-related kinases (Yoshino *et al.*, 2012;  
81 Irieda *et al.*, 2019). For other instances, the homologous effectors CoDN3 from *C.*  
82 *orbiculare* and ChEC3 from *Colletotrichum higginsianum*, a pathogen that causes  
83 anthracnose disease on Brassicaceae plants, suppress plant cell death induced by NIS1  
84 and NLP1, respectively, when they are expressed together in *N. benthamiana* (Yoshino  
85 *et al.*, 2012; Kleemann *et al.*, 2012). Recently, a highly conserved *Colletotrichum*  
86 effector candidate that induces host nuclear expansion and cell death was identified

87 (Tsushima *et al.*, 2021). However, *Colletotrichum* effectors such that induce an immune  
88 response in the host plant have not been reported.

89         Recently, there has been an increasing number of reports on RNAs in the  
90 apoplast, an interface of plant-fungal interactions. In *Arabidopsis thaliana*, apoplastic  
91 fluid contains diverse small and long-noncoding RNAs (Baldrich *et al.*, 2019; Karimi *et*  
92 *al.*, 2021). In addition, small RNAs are exchanged between host plants and colonizing  
93 organisms, such as parasitic plants or microbes (Weiberg *et al.*, 2013; Wang *et al.*,  
94 2016; Zhang *et al.*, 2016; Shahid *et al.*, 2018; Cai *et al.*, 2018). Thus, apoplast may  
95 serve a place of communications between the different organisms. However, the nature  
96 and roles of RNAs in the apoplast in plant-microbe interactions are still open questions.

97         Here, we show that *C. orbiculare* ribonuclease effectors potentiate host  
98 immune responses in their catalytic residue-dependent manner. By comparing the  
99 genomes of two different *Colletotrichum* species, we identified 21 conserved effector  
100 candidates that are expressed upon infection. Among these, secreted ribonuclease 1  
101 (SRN1) and the close homolog SRN2 were found as cell death-inducing effectors when  
102 transiently expressed in *N. benthamiana*. Interestingly, however, neither SRN1 nor  
103 SRN2 induced cell death in *Cucumis sativus*, an original host of *C. orbiculare* from  
104 which the strain was isolated. Instead, SRN1 and SRN2 potentiated host immune  
105 responses; *C. orbiculare srn1 srn2* double deletion mutants showed increased virulence  
106 on *C. sativus*. Importantly, the potentiation of host immunity requires ribonuclease  
107 catalytic residues as well as the signal peptide, implying that SRNs cleave RNAs in the  
108 apoplast and are detected by the host. Consistent with this scenario, biochemical  
109 analysis revealed that SRN1 is a single-stranded RNA (ssRNA) specific ribonuclease,  
110 cleaving at guanosine and leaving a 3'-end phosphate. Collectively, our data suggest  
111 that the enzymatic nature of SRN1 secreted from a phytopathogenic fungus can be  
112 recognized by the host cell to drive plant immunity. Our study reveals a novel aspect of  
113 plant-microbe interaction mediated by specific single-stranded ribonuclease effectors.

114

## 115 **Materials and Methods**

### 116 **Identification of conserved effector candidates**

117 Conserved effector candidates among *C. orbiculare* and *C. higginsianum* were  
118 identified as described in Fig. 1a. Orthologs of *C. orbiculare* secreted proteins were

119 identified in *C. higginsianum* (O’Connell *et al.*, 2012) by performing a BLASTp search  
120 (E-value cut-off 1E-9). Hits were further filtered by searching for evidence of  
121 expression in *C. higginsianum* orthologs according to expression sequence tag (EST)  
122 data (Takahara *et al.*, 2009), removing hits that were annotated with the keywords  
123 glycosylphosphatidylinositol (GPI), membrane, mitochondrial or cytochrome, and  
124 retaining sequences that encoded proteins of less than 350 amino acids. To identify  
125 genes with potential roles in infection, only the highest scoring BLASTp hits of *C.*  
126 *orbiculare* genes that had previously been shown to be up-regulated *in planta* (Gan *et*  
127 *al.*, 2013) were selected (Supporting Information Table S1).

128

### 129 **Identification of PF00545 ribonucleases from diverse fungi**

130 Hmmscan was run against the Pfam 27.0 database using the default settings to identify  
131 proteins with the PF00545 ribonuclease domain (Finn *et al.*, 2014; Eddy, 2011).  
132 Searches were run against 32 genomes from diverse fungi (Supporting Information  
133 Table S2) (Goffeau *et al.*, 1996; Galagan *et al.*, 2003; Loftus *et al.*, 2005; Dean *et al.*,  
134 2005; Kämper *et al.*, 2006; Cuomo *et al.*, 2007; Espagne *et al.*, 2008; Coleman *et al.*,  
135 2009; Martin *et al.*, 2010; Spanu *et al.*, 2010; Rouxel *et al.*, 2011; Kubicek *et al.*, 2011;  
136 Duplessis *et al.*, 2011; Goodwin *et al.*, 2011; Klosterman *et al.*, 2011; Amselem *et al.*,  
137 2011; Yang *et al.*, 2011; Berka *et al.*, 2011; Arnaud *et al.*, 2012; O’Connell *et al.*, 2012;  
138 Gan *et al.*, 2013, 2016, 2017; Blanco-Ulate *et al.*, 2013; Cissé *et al.*, 2013; Tisserant *et*  
139 *al.*, 2013; Baroncelli *et al.*, 2014; Hu *et al.*, 2014; Gazis *et al.*, 2016; Zampounis *et al.*,  
140 2016).

141 Proteins identified with the PF00545 domain were aligned by MAFFT and  
142 trimmed using trimAl (Katoh *et al.*, 2002; Capella-Gutiérrez *et al.*, 2009) using the  
143 default automated settings in both programs. The trimmed alignment was then used to  
144 construct a maximum likelihood tree with RAxML using the PROTAUTOGAMMA  
145 setting and 1,000 bootstrap replicates (Stamatakis, 2006). The conservation of active  
146 sites was assessed by checking for residues corresponding to *Aspergillus oryzae*  
147 ribonuclease T1 (RNase T1) Y64, H66, E84, R103, and H118 in the conserved domain  
148 cd00606 (NCBI’s conserved domain database) (Marchler-Bauer *et al.*, 2017).

149 To generate the fungal species phylogenetic tree, single copy gene families  
150 were identified by orthoMCL (Li *et al.*, 2003) from the 32 fungi analyzed using

151 all-vs-all BLASTp with a cut-off E-value of 1E-5 and an inflation value of 1.5.  
152 Sequences from individual gene families were aligned using MAFFT and trimmed  
153 using trimAl (Kato *et al.*, 2002; Capella-Gutiérrez *et al.*, 2009) as described above.  
154 Then, trimmed alignments from the 501 single copy gene families identified were  
155 concatenated resulting in a dataset of 227,412 sites. The concatenated alignment was  
156 used for RAxML analysis which was carried out as described above. *Rhizophagus*  
157 *irregularis* was set as the root using FigTree v1.4.2 (Rambaut, Andrew) in the best  
158 estimated tree, which was then converted to an ultrametric chronogram using r8s  
159 version 1.8 (Sanderson, 2003) using the Langley-Fitch molecular clock model.  
160 Previously estimated divergence times of 443–695 million years ago (mya) for  
161 Pezizomycotina-Saccharomycotina, 400-583 mya for the Pezizomycotina crown group,  
162 267-430 mya for the Leotiomycetes-Sordariomycetes, 207-339 mya for  
163 Sordariomycetes, 487-773 mya for the Ascomycete crown (Beimforde *et al.*, 2014) and  
164 47 mya for the divergence between *C. graminicola* and *C. higginsianum* (O’Connell *et al.*,  
165 2012) were used to calibrate the tree. The phylogenetic trees generated were  
166 visualized in the interactive Tree of Life (Letunic & Bork, 2016).

167

#### 168 **Prediction of SRN homologs in 22 *Colletotrichum* species**

169 Using amino acid sequences of *C. orbiculare* SRN1, SRN2, SRN3.1, SRN3.2, and  
170 SRN4 as queries, genomes of 22 *Colletotrichum* species were searched by Exonerate  
171 version 2.2 software. Proteins lacking signal peptides predicted by SignalP 4.1 software  
172 (Petersen *et al.*, 2011) were removed. The sequences were aligned using Molecular  
173 Evolutionary Genetics Analysis (Mega) Version 7.0 (Kumar *et al.*, 2016). The  
174 phylogenetic tree of the SRN homologs was then drawn using the same software.

175

#### 176 **Plant growth conditions**

177 *N. benthamiana* plants were grown in a mixture of equal amounts of Supermix A  
178 (Sakata Seed Corp.) and vermiculite in 8 cm TO poly-pots (Tokai Agri System) under  
179 16 h light:8 h dark conditions at 25 °C. *C. sativus* strain Suyo (Sakata Seed Corp.)  
180 plants were grown in the same soil mix and incubated under 10 h light: 14 h dark  
181 conditions at 24 °C.

182

183 **Plasmids**

184 Plasmids used in this study are listed in Supporting Information Table S3. The method  
185 for plasmid construction is described in Supporting Information Method S1. Primers  
186 used in this study are listed in Supporting Information Table S4.

187

188 **Transient gene expression in *N. benthamiana* and *C. sativus***

189 *Agrobacterium*-mediated transient gene expression was performed following the  
190 previously described method with modifications (Chen *et al.*, 2021). The  
191 *Agrobacterium tumefaciens* GV3101 and GV2260 strains were used. GV2260 strains  
192 were transformed with both pBBR*gabT* (Nonaka *et al.*, 2017) and pEAQ-based  
193 plasmids (Sainsbury *et al.*, 2009). The *Agrobacterium* culture was washed and  
194 resuspended in infiltration solution (10 mM MES pH 5.6, 10 mM MgCl<sub>2</sub>, and 150 μM  
195 acetosyringone). Infiltration solutions were at a density of O.D. 600 = 0.3. Each  
196 infiltration solution was infiltrated into 4-5 week-old *N. benthamiana* leaves or 6-9  
197 day-old cotyledons of *C. sativus* using 1 ml syringes (TERUMO). An ultraviolet lamp  
198 MODEL B-100AP (UVP) was used for UV illumination. Photographs were taken using  
199 an EOS Kiss X6i (Canon). For UV illuminated leaves, a Y2 Professional Multi Coated  
200 Camera Lens Filter (Kenko) was used.

201

202 **RNA isolation, cDNA synthesis, and RT-qPCR**

203 For obtaining vegetative hyphae (VH), *C. orbiculare* wild-type strain 104-T (MAFF  
204 240422) was cultured on potato dextrose agar (PDA) medium (Nissui) then transferred  
205 onto potato dextrose (BD) liquid media and incubated for 3 days at 25 °C in the dark.  
206 For obtaining conidia, *C. orbiculare* hyphae were inoculated onto PDA media and  
207 incubated at 25 °C under black light blue light (10 h light: 14 h dark) for 6 days.  
208 Conidia were then suspended in water, filtered and collected by centrifugation. For one,  
209 three, and seven days post-inoculation (dpi), 1 × 10<sup>6</sup> conidia ml<sup>-1</sup> *C. orbiculare* conidia  
210 in 0.02% Silwet L-77 (Bio Medical Science) were inoculated onto the abaxial side of *C.*  
211 *sativus* cotyledons at 10 days post-germination (dpg) using a brush. Peeled epidermal  
212 cells were used for 1 and 3 dpi samples. Whole leaf tissues were used for 7 dpi samples.  
213 Three independent biological replicates were prepared for each sample.



214 For fungal biomass measurements, leaf disks were collected from *C. sativus*  
215 cotyledons infected with fungi at 88 hours post-inoculation (hpi) (as described in Fungal  
216 inoculation section) using a cork borer (4 mm diameter). Each sample consisted of at  
217 least six leaf disks from at least six leaves. Six replicates were prepared for each sample.  
218 All samples were transferred into 2-ml steel-top tubes, frozen using liquid nitrogen, and  
219 stored at -80 °C until RNA isolation. Total RNA isolation, DNA removal, cDNA  
220 synthesis and real-time quantitative PCR (RT-qPCR) reactions were performed as  
221 previously described (Kumakura *et al.*, 2019) with slight modifications. First strand  
222 cDNA synthesis was performed with the ReverTra Ace qPCR RT Kit (TOYOBO) using  
223 the included primer mix, as well as gene-specific primers (listed in Supporting  
224 Information Table S4). Primer pairs used for RT-qPCR are also listed in Supporting  
225 Information Table S4.

226

### 227 **Fungal transformation and inoculation**

228 The methods for fungal transformation and fungal inoculation are described in  
229 Supporting Information Method S2 and S3, respectively.

230

### 231 **Sequence alignment of SRNs**

232 Amino acid sequences were aligned using CLC Genomics Workbench8 (CLC Bio). All  
233 coding sequences of *C. orbiculare* SRNs used in this report were cloned from *C.*  
234 *orbiculare* cDNAs and sequenced for verification.

235

### 236 **Measurement of oxidative burst from leaf disks**

237 To detect chitin-induced reactive oxygen species (ROS) bursts, eight leaf disks were  
238 collected from *C. sativus* leaves using a cork borer (4 mm diameter) (Kai industries Co.,  
239 Ltd.). Leaf disks were floated for more than 10 h on sterile water in 96-well microplates  
240 (655075, Greiner Bio-One), then the water was substituted by a solution containing 10  
241 mg ml<sup>-1</sup> horseradish peroxidase (Sigma), 1 μM L-012 (Wako), and 10 μM chitin  
242 heptose (Oligo Tech). Luminescence was measured for 30 min using a TriStar2 LB942  
243 multi-plate reader (Berthold) (Kadota *et al.*, 2018).

244

### 245 **Immunoblotting**



246 The method for immunoblotting is described in Supporting Information Method S4.

247

#### 248 **Protein deglycosylation enzyme treatment**

249 Proteins isolated from *N. benthamiana* using the method described in the  
250 immunoblotting section were treated with Protein Deglycosylation Mix II (New  
251 England BioLabs) following the manufacturer's protocol. Then, Samples were mixed  
252 with SDS-Laemmli buffer and analyzed by immunoblot.

253

#### 254 **Recombinant protein expression and purification**

255 The method for immunoblotting is described in Supporting Information Method S5.

256

#### 257 **In vitro RNase assay**

258 RNA substrates used in this study are shown in Fig. 6a, 6b, and Supplementary  
259 Information Fig. S7c. As ssRNA substrates, AG10  
260 (5'-AGAGAGAGAGAGAGAGAGAG-3'), UC10  
261 (5'-UCUCUCUCUCUCUCUCUCUC-3'), ssRNA1  
262 (5'-AUCAUGCAUCAUCAUCA-3'), ssRNA2  
263 (5'-AUCAUCAUCAGUCAUCAUCA-3'), ssRNA3  
264 (5'-AUCAUCAUCAUCAUCGAUCA-3'), ssRNA4  
265 (5'-UCGCGUUGAUUACCCUGUUAUCCCUAGUGUACAU-3') were chemically  
266 synthesized with fluorescein (FAM) addition at their 5' end by Hokkaido System  
267 Science Co., Ltd. As a double-stranded RNA (dsRNA) substrate, dsRNA4 was prepared  
268 as following. ssRNA4 and chemically synthesized ssRNA  
269 (5'-AUGUACACUAGGGUAUACAGGGUAAUCAACGCGA-3') which is  
270 complementary to ssRNA4 were mixed in buffer (20 mM Tris-HCl pH7.5, 150 mM  
271 NaCl, 1 mM DTT, and 2 mM MgCl<sub>2</sub>). The mixture was incubated at 95 °C for 5 min  
272 and then at room temperature for 30 min, resulting in dsRNA4.

273 For in vitro RNase assay, recombinant proteins or commercially available  
274 RNase T1 (Thermo Fisher Scientific) were mixed with 0.5 pmol substrate RNAs in 10  
275 µl RNase reaction buffer with EDTA (20 mM Tris-HCl pH7.5, 150 mM NaCl, 1 mM  
276 DTT, and 5 mM EDTA) or 10 µl RNase reaction buffer with MgCl<sub>2</sub> (20 mM Tris-HCl  
277 pH7.5, 150 mM NaCl, 1 mM DTT, and 5 mM MgCl<sub>2</sub>). The reaction was incubated for

278 30 min at 25 °C, then mixed with an equal volume of 2×RNA loading buffer [95% (v  
279 v<sup>-1</sup>) formamide, 0.025% (w v<sup>-1</sup>) SDS, and 0.5 mM EDTA], incubated 95 °C for 3 min,  
280 and cooled on ice for 1 min. The reaction was separated by 15% denaturing acrylamide  
281 urea gel electrophoresis. Signals of FAM labelled RNAs were detected using PharosFX  
282 (Bio-Rad) imaging systems.

283

#### 284 **Linker ligation of RNAs**

285 Linker ligation of RNAs was performed as previously described (Mito *et al.*, 2020).  
286 Details are in Supporting Information Method S6.

287

#### 288 **Results**

##### 289 **Prediction of *Colletotrichum* conserved effectors and identification of a cell 290 death-inducing effector in *N. benthamiana***

291 To survey conserved effectors in the *Colletotrichum* genus, we reasoned that the  
292 candidates should be secreted to interact with host plant, conserved in the genus, and  
293 highly expressed during infection. Considering these criteria, we compared protein  
294 sequences from *C. orbiculare* and *C. higginsianum*, belonging to the orbiculare and  
295 destructivum species complexes, respectively. A total of 21 small secreted orthologous  
296 proteins, with evidence of up-regulation both in *C. higginsianum* and *C. orbiculare*  
297 during infection (Takahara *et al.*, 2009; Gan *et al.*, 2013), were selected as effector  
298 candidates conserved in the two pathogens (Fig. 1a, Supporting Information Table S1).

299           Among them, we found that one of the *C. orbiculare* effector  
300 candidates induced cell death (Fig. 1b) when expressed transiently in *N. benthamiana*.  
301 The gene that induced cell death (Locus tag: Cob\_v010174) was named SECRETED  
302 RIBONUCLEASE 1 (*SRN1*), due to the presence of the ribonuclease domain (Pfam  
303 database: PF00545, NCBI's conserved domain database: cd00606) and the signal peptide  
304 sequence (Fig. 1c). The *C. orbiculare* genome is predicted to encode three other  
305 *SRN1*-like genes and we therefore termed them as *SRN2*, *SRN3* and *SRN4* (Supporting  
306 Information Fig. S1a, Table S6). By cloning the coding sequences from the cDNA of *C.*  
307 *orbiculare* we found that each gene transcript had a single isoform except for *SRN3*,  
308 which had two different isoforms (denoted as *SRN3.1* and *SRN3.2*) (Fig. 1c).

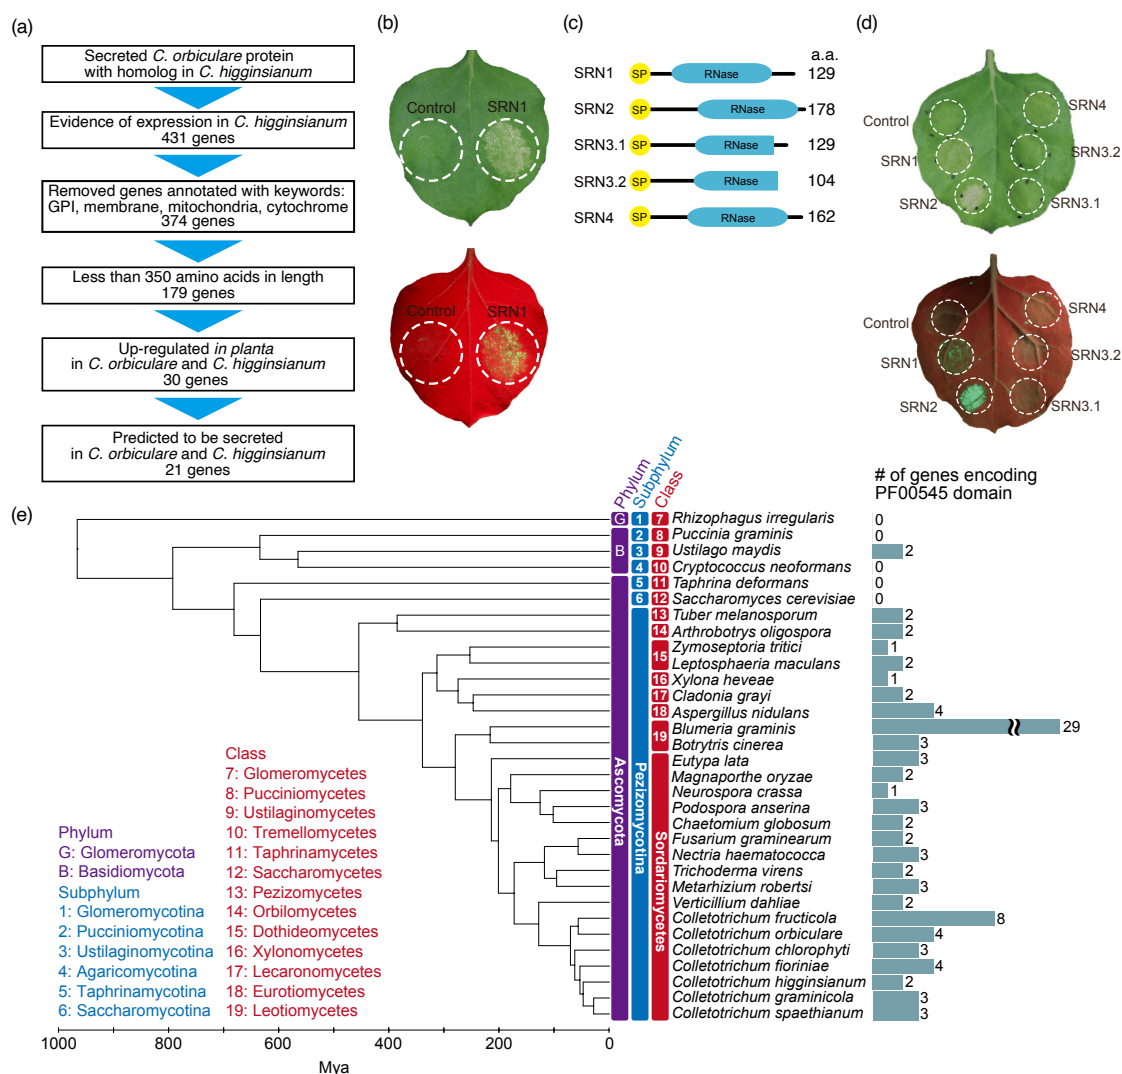

309

310

**Figure 1. Identification of conserved *Colletotrichum* effectors that induce cell death in *N. benthamiana***

311

312

(a) Effector prediction pipeline in *C. orbiculare* and *C. higginsianum*.

313

(b) *N. benthamiana* leaf expressing *C. orbiculare* SRN1 using the *Agrobacterium*-mediated

314

transient gene expression system. The pGWB2 binary vector was used. An

315

*Agrobacterium* strain transformed with an empty vector was used for control.

316

Photographs were taken at 6 days post-inoculation (dpi). The bottom image was taken

317

under ultraviolet illumination to visualize plant cell death in green with

318

autofluorescence.

319

(c) Schematics of *C. orbiculare* SRN proteins. Yellow and blue boxes

320

represent the signal peptides and RNase domains, respectively, that are conserved

321

among SRN homologs. a. a. represents number of amino acids.

322

(d) Cell death phenotypes of SRN1, SRN2, SRN3.1, SRN3.2, and SRN4 expressed as in (b).

323

(e) PF00545 ribonuclease domain-containing proteins are highly conserved in fungi.

324

Numbers of PF00545 ribonuclease domain-containing proteins in different fungi.

325

Divergence dates were estimated based on a maximum likelihood tree constructed from

501 single copy genes in all the analyzed fungi using the program r8s.

326 SRN1, SRN2, and SRN4 had five conserved ribonuclease catalytic residues inside their  
327 ribonuclease domains, while SRN3.1 and SRN3.2 contained only the first three  
328 (Supporting Information Fig. S1b) (Nishikawa *et al.*, 1987; Noguchi *et al.*, 1995;  
329 Marchler-Bauer *et al.*, 2017).

330 To test the functional resemblance with *SRN1*, cell death induced by *SRN2*,  
331 *SRN3.1*, *SRN3.2*, and *SRN4* expressions was monitored in *N. benthamiana*. Like *SRN1*,  
332 *SRN2* induced cell death, while *SRN3.1*, *SRN3.2* and *SRN4* did not (Fig. 1d). Since the  
333 insufficient expression may hamper the conclusion, we harnessed the pEAQ-HT vector,  
334 which enables higher expression of proteins (Sainsbury *et al.*, 2009). In this system, in  
335 addition to *SRN1* and *SRN2*, *SRN4* also induced cell death in *N. benthamiana*  
336 (Supporting Information Fig. S2a). The proteins with C-terminal HA tag did not impact  
337 on the cell death induced by *SRN1*, *SRN2*, and *SRN4* (Supporting Information Fig. S2b).  
338 We note that *SRN3.1-HA* weakly induced cell death in this high-expression system,  
339 while *SRN3.2-HA* did not, despite its expression being confirmed by immunoblot  
340 analysis (Supporting Information Fig. S2c).

341

#### 342 ***SRN* homologs are conserved in all 22 *Colletotrichum* species tested**

343 To analyze the conservation of *SRN1*, we surveyed the PF00545 ribonuclease domain in  
344 the Pfam database (Finn *et al.*, 2014) because *SRN1* encodes the domain. Genes  
345 encoding PF00545 domains were conserved in bacteria and fungi, especially in  
346 Ascomycota, but not in plants and animals (Pfam 34.0) (Mistry *et al.*, 2021) (Fig. 1e, 2),  
347 suggesting that PF00545 is the microorganisms specific domain. In fungi, all 26  
348 Pezizomycotina species tested were predicted to encode proteins with the PF00545  
349 domain. However, most species belonging to the Glomeromycota and Basidiomycota  
350 did not have the PF00545 domain, except for *Ustilago maydis*, a causal agent of corn  
351 smut.

352 To confirm if SRNs are conserved in the *Colletotrichum* genus, the genomes  
353 of 22 available *Colletotrichum* species (Supporting Information Table S7) were  
354 surveyed for the presence of SRN homolog-encoding sequences. Full-length amino acid  
355 sequences of *C. orbiculare* SRN1, SRN2, SRN3.1, SRN3.2, and SRN4 were used to  
356 query the whole genome sequences of the 22 species. All species tested had at least two  
357 SRN homologs (Supporting Information Table S7).

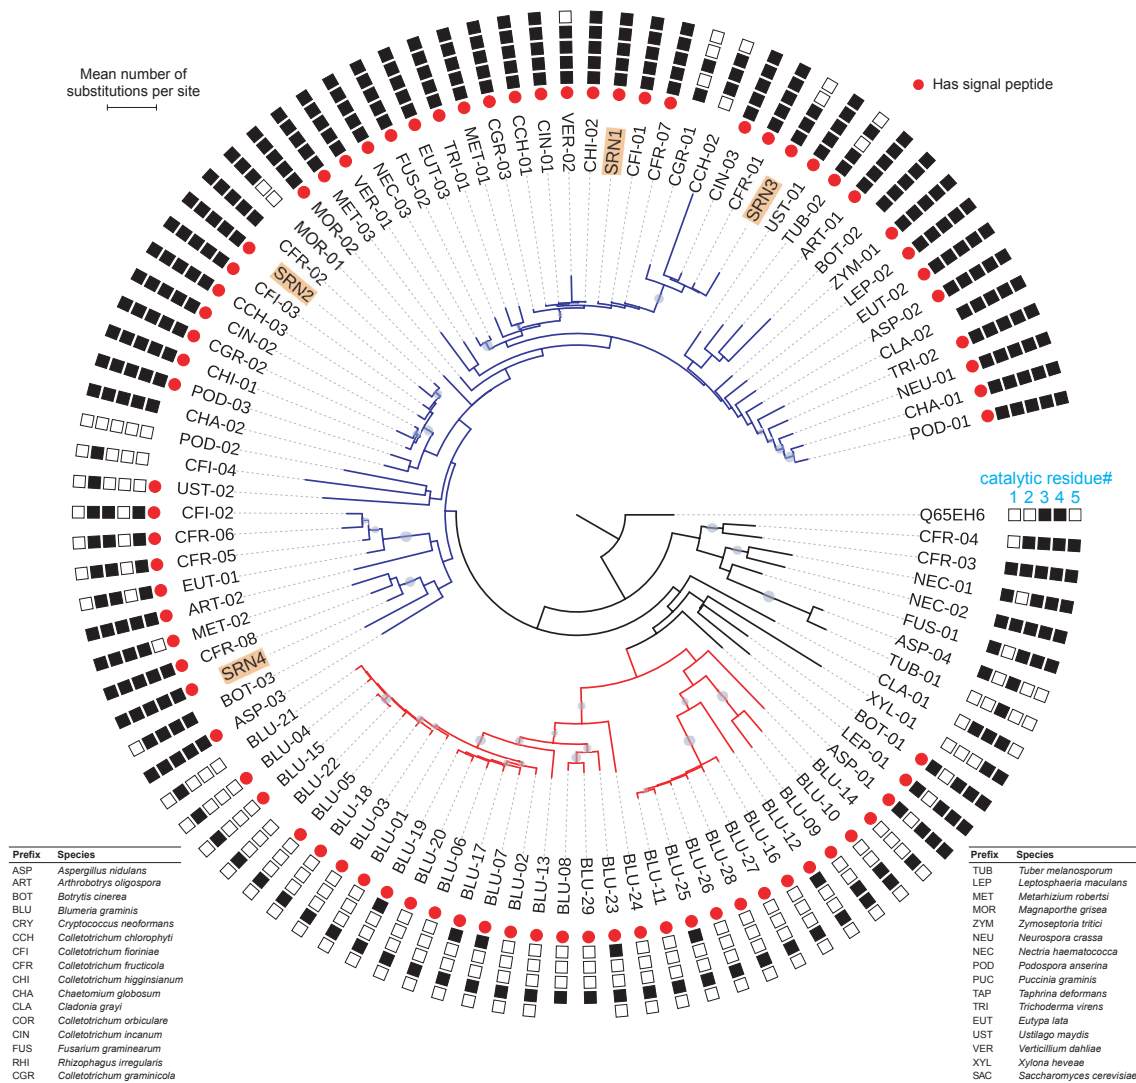

358

359

360 **Figure 2. Phylogenetic relationship between fungal ribonuclease proteins**

361 Maximum likelihood tree of sequences associated with the PF00545 ribonuclease  
 362 domain in 32 different fungi drawn using the RAxML software. Grey circles on  
 363 branches indicate branches with more than 50% bootstrap support values out of 1000  
 364 replicates. Black squares indicate conservation of five residues that are important for the  
 365 ribonuclease catalytic activity. Red circles indicate the presence of a signal peptide  
 366 according to the analysis by SignalP4.0.

367



368 Based on the sequence similarity, the SRN homologs were classified into three groups  
369 named SRN1/3, SRN2, and SRN4. All 22 species had homologs belonging to the  
370 SRN1/3 and SRN2 groups, but only species from the gloeosporioides and orbiculare  
371 species complexes had the SRN4 group genes (Supporting Information Table S7). All  
372 species from the same species complex had the same composition of SRN homologs,  
373 except for the spaethianum species complex (Supporting Information Table S7).

374

### 375 **Cell death by *SRNs* is not observed in *C. sativus*, an original host of *C. orbiculare***

376 The SRN-mediated cell death observed in *N. benthamiana* led us to test the same  
377 phenotype in *C. sativus* (cucumber), an original host of *C. orbiculare*. To set out the  
378 protein expression in cucumber, we applied an *Agrobacterium*-mediated transient gene  
379 expression system established in melon (Chen *et al.*, 2021) with several modifications.  
380 Here we used *A. tumefaciens* GV2260 strain which has the enhanced T-DNA  
381 translocation activity in certain plant species through expressing *gabT* gene (Nonaka *et*  
382 *al.*, 2017). Indeed, this system allowed to accumulate GFP protein (as a marker protein)  
383 in fluorescence imaging (Supporting Information Fig. S3a) and in immunoblot  
384 (Supporting Information Fig. S3b). Harnessing this setup, we expressed *C. orbiculare*  
385 SRNs in *C. sativus*. Contrary to our expectation by *N. benthamiana* experiments, none  
386 of the *SRN* constructs induced detectable cell death on *C. sativus* cotyledons despite the  
387 detection of protein expression from these constructs (Fig. 3a, b).

388

### 389 **SRN1 and SRN2 enhance chitin-triggered ROS bursts in *C. sativus***

390 Given the tolerance to ectopic SRN expression in *C. sativus*, we were intrigued by the  
391 *SRN* genes expression profiles during *C. orbiculare* infection. RT-qPCR analysis  
392 revealed that all *SRNs*, except for SRN3.1 and SRN3.2, were strongly induced during  
393 infection compared to VH, non-inoculated fungal cells, especially at 1 dpi (Fig. 3c),  
394 implying that these effectors are likely to be involved in plant-fungi interaction at the  
395 early biotrophic phase. The upregulation of *SRNs* at 1 dpi prompted us to test if *SRNs*  
396 impact on plant immune responses in *C. sativus*. For this purpose, we monitored ROS  
397 bursts, a typical PTI response, triggered by chitin treatment (Torres *et al.*, 2006). As  
398 shown in Supporting Information Fig. S4, chitin treatment strongly induced ROS bursts  
399 in *C. sativus* cotyledons.

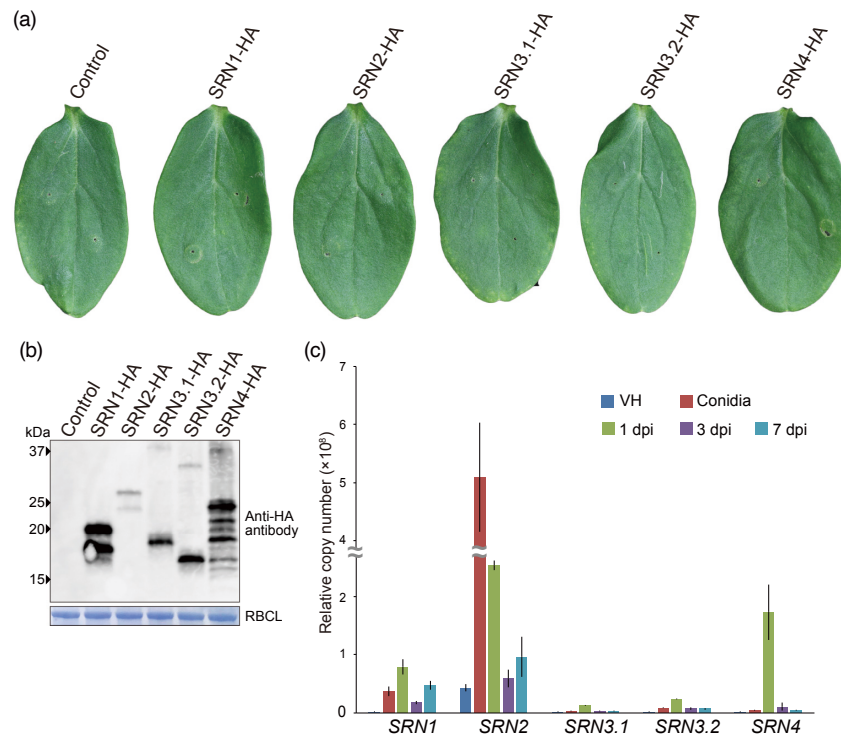

400

401 **Figure 3. Expression of *C. orbiculare* SRNs on *C. sativus* leaves**

402 (a) *C. sativus* cotyledons expressing HA-tagged SRNs using the  
403 *Agrobacterium*-mediated transient gene expression system. Photographs were taken at 5  
404 dpi. Suspensions of *Agrobacteria* were infiltrated throughout the leaves. (b)  
405 Immunoblot analysis of proteins isolated from *C. sativus* cotyledons expressing SRNs.  
406 Total proteins were extracted at 5 dpi. The estimated molecular weight of each protein  
407 is as follows; SRN1-HA: 17.1 kDa, SRN2-HA: 22.9 kDa, SRN3.1-HA: 17.5 kDa,  
408 SRN3.2-HA: 14.8 kDa, SRN4-HA: 21.9 kDa. Anti-HA antibody (Roche) was used to  
409 detect tagged proteins. Coomassie-stained Rubisco large subunit (RBCL) proteins were  
410 used as loading controls. (c) Levels of *SRNs* transcripts during different infection stages  
411 of *C. orbiculare* were quantified using RT-qPCR. Total RNA was isolated from  
412 vegetative hyphae (VH) grown in vitro, conidia, and infected *C. sativus* leaves at 1, 3,  
413 and 7 dpi. To compare the number of transcripts from each gene, the copy number of  
414 each transcript was calculated using the standard curve drawn for the plasmid harboring  
415 the sequence of each transcript. Copy numbers were relative to the constitutively  
416 expressed *C. orbiculare* ribosomal protein L5 gene (Cob\_v012718). Three biological  
417 replicates and two technical replicates were analyzed. Data represent mean  $\pm$ SE.

418

419



420 Next, we examined the chitin-triggered ROS bursts in *C. sativus* cotyledons expressing  
421 either SRN1-HA, SRN2-HA, SRN3.1-HA, SRN3.2-HA, or SRN4-HA (Fig. 4a).  
422 Remarkably, *SRN1-HA* and *SRN2-HA* significantly enhanced chitin-triggered ROS  
423 bursts compared to GFP controls. On the other hand, SRN3.1-HA, SRN3.2-HA, and  
424 SRN4-HA did not, despite the detectable proteins accumulated (Fig. 4b). These data  
425 indicated that SRN1 and SRN2 leads to immune responses in host plants.

426

#### 427 **Enhancement of PTI by *SRN1/2* requires their catalytic residues and signal** 428 **peptides**

429 A previous report shows that two histidine residues (H40 and H92) are required for the  
430 ribonuclease catalytic activity of *A. oryzae* RNase T1, a homolog of SRNs (Nishikawa  
431 *et al.*, 1987). To test whether histidine-dependent ribonuclease catalytic activity is  
432 involved in the ROS burst enhancement, we mutated the histidine residues of SRN1  
433 corresponding to those of *A. oryzae*, H63 and H114, to alanine (SRN1<sup>H63A/H114A</sup>).  
434 Strikingly, the substitution abolished the SRN1-mediated ROS bursts (Fig. 4c). We also  
435 noticed that the single mutation of H114 alone reduced the enhancement of  
436 chitin-triggered ROS bursts (Fig. 4c). The similar double mutations (H92A and H130A)  
437 and single mutation (H130A) in SRN2 showed the same trends (Fig. 4e). Overall, we  
438 concluded that the ribonuclease catalytic residues of SRN1 and SRN2 are required for  
439 the enhancement of chitin-triggered ROS bursts.

440 Next, we assessed the effect of the signal peptide of SRN1 by deleting the  
441 sequence (SRN1<sup>ΔSP</sup>). The signal peptide-deleted SRN1 and SRN2 did not enhance  
442 chitin-triggered ROS bursts (Fig. 4c). These data suggest that the enhancement of the  
443 chitin-triggered response requires SRN1 and SRN2 to be external to the host cell,  
444 probably in the apoplastic region. We note that none of the loss of ROS burst  
445 enhancement by substitutions could be explained by the abrogation of protein  
446 expression (Fig. 4d and 4f).

447 The SRN proteins expressed in our setup were predicted to be modified  
448 post-translationally because all showed multiple bands larger than expected in  
449 immunoblots (Fig. 3b). Given that signal peptide-dependency for the mobility shift (Fig.  
450 4d), one plausible post-translational modification is glycosylation.

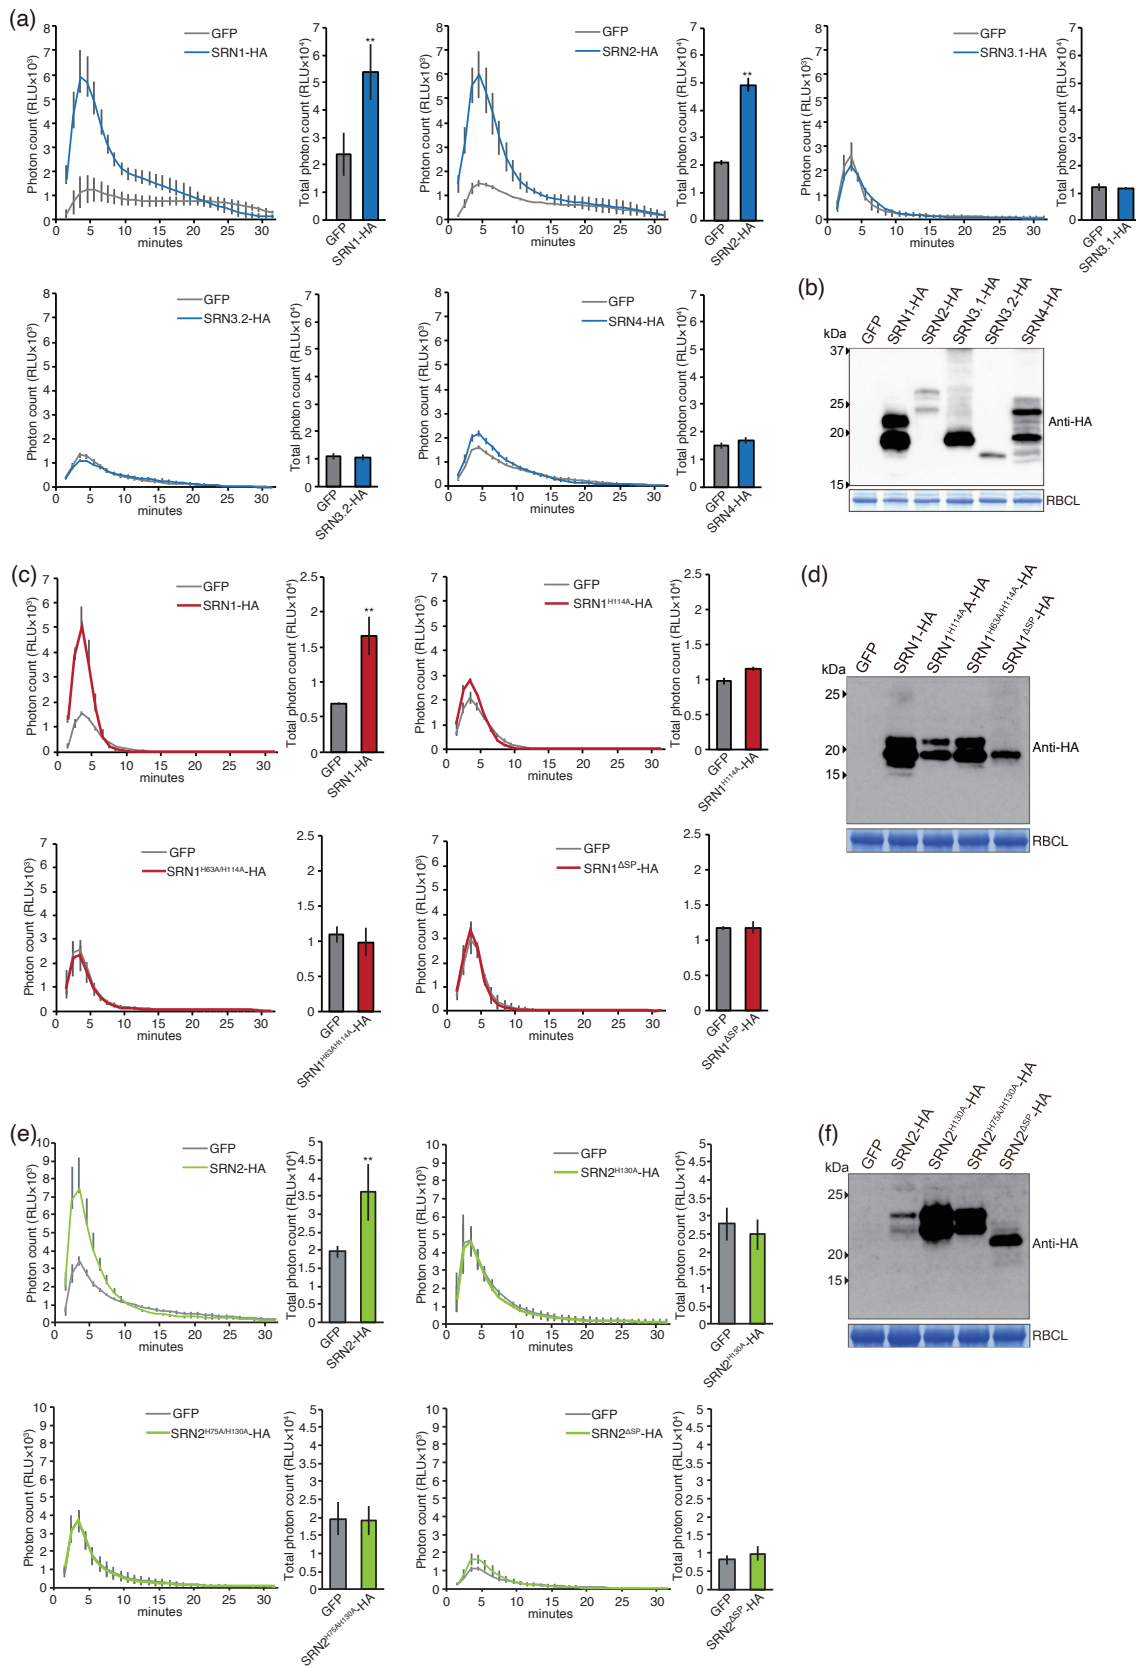

451

452 **Figure 4. SRN1 and SRN2 expression potentiates chitin-triggered ROS bursts in *C.***

453 ***sativus* leaves**

454 (a) Enhancement of chitin-triggered ROS bursts was observed in *C. sativus* cotyledons  
455 expressing SRN1-HA and SRN2-HA. Oxidative bursts were elicited by chitin (10  $\mu$ M).  
456 Total photon counts were the sum of RLUs (relative light units) for a 30 min  
457 measurement. Three independent experiments showed similar results. Data represent  
458 mean  $\pm$ SE (n=3). (b) Expression of SRN1-HA, SRN2-HA, SRN3.1-HA, SRN3.2-HA,  
459 and SRN4-HA proteins in *C. sativus* was confirmed by immunoblot analysis. Details of  
460 the analysis are the same as for the immunoblot in Fig. 3b. (c) Ribonuclease catalytic  
461 residues and the signal peptide of SRN1 are required for the chitin-triggered ROS burst  
462 enhancement. The H114 ribonuclease catalytic residue of SRN1 was mutated in  
463 SRN1<sup>H114A</sup>-HA. Both H63 and H114 ribonuclease catalytic residues of SRN1 were  
464 mutated in SRN1<sup>H63A/H114A</sup>-HA. The predicted signal peptide of SRN1 was deleted in  
465 SRN1 <sup>$\Delta$ SP</sup>-HA. Experiments were performed as described in (a). Data represent mean  
466  $\pm$ SE (n=3). (d) Protein expression from the wild-type and mutated series of SRN1  
467 (SRN1-HA, SRN1<sup>H114A</sup>-HA, SRN1<sup>H63A/H114A</sup>-HA, and SRN1 <sup>$\Delta$ SP</sup>-HA) was confirmed by  
468 immunoblot analysis. The estimated molecular weight of each protein is as follows;  
469 SRN1-HA, SRN1<sup>H114A</sup>-HA and SRN1<sup>H63A/H114A</sup>-HA: 17.1 kDa, SRN1 <sup>$\Delta$ SP</sup>-HA: 15.5 kDa.  
470 (e) Ribonuclease catalytic residues and the signal peptide of SRN2 were required for the  
471 chitin-triggered ROS burst enhancement. The H130 ribonuclease catalytic residue of  
472 SRN2 was mutated in SRN2<sup>H130A</sup>-HA. Both H75 and H130 ribonuclease catalytic  
473 residues of SRN2 were mutated in SRN2<sup>H75A/H130A</sup>-HA. The predicted signal peptide of  
474 SRN2 was deleted in SRN2 <sup>$\Delta$ SP</sup>-HA. Experiments were performed as described in (a).  
475 Data represent mean  $\pm$ SE (n=3). (f) Expression of wild-type and mutated series of  
476 SRN2 (SRN2-HA, SRN2<sup>H130A</sup>-HA, SRN2<sup>H75A/H130A</sup>-HA, and SRN2 <sup>$\Delta$ SP</sup>-HA) was  
477 confirmed by immunoblot analysis. The estimated molecular weight of each protein is  
478 as follows; SRN2-HA, SRN2<sup>H130A</sup>-HA, and SRN2<sup>H75A/H130A</sup>-HA: 22.9 kDa,  
479 SRN2 <sup>$\Delta$ SP</sup>-HA: 21.2 kDa. \*\* indicates p < 0.01 (t-test) (a, c, e). Anti-HA antibody was  
480 used to detect HA-tagged proteins (b, d, f). Coomassie-stained RBCL proteins were  
481 used as loading controls (b, d, f).  
482

483 Therefore, we predicted the glycosylation sites of SRNs using the NetNGlyc 1.0 server  
484 (Gupta & Brunak, 2002) and found that SRN1, SRN3.1, SRN3.2, and SRN4 have one  
485 potential glycosylated site each, while SRN2 has two. To assess whether glycosylation  
486 affects the function of SRNs, we mutated the predicted glycosylation sites (N101 and  
487 N143) of SRN2, as a representative of the SRNs, creating SRN2<sup>N101Q/N143Q</sup> (Supporting  
488 Information Fig. S5a). As expected, this substitution constricted into a single protein  
489 band in immunoblot (Supporting Information Fig. S5b). Moreover, the treatment by  
490 deglycosylation enzyme reduced the intensity of the two bands in original SRN2 and  
491 generated a lower band, which was the same size as SRN2<sup>N101Q/N143Q</sup> (Supporting  
492 Information Fig. S5c). However, irrespective of the glycosylation, we observed the  
493 immunity response by SRN2; SRN2<sup>N101Q/N143Q</sup> induced chitin-triggered ROS bursts at  
494 the same level as the wild-type SRN2 in *C. sativus* (Supporting Information Fig. S5d-f)  
495 without any visible phenotype (Supporting Information Fig. S5g). In summary, these  
496 data suggest that the glycosylation of SRN2 does not affect its enhancement of  
497 chitin-triggered ROS bursts when expressed in *C. sativus*.

498

#### 499 **Chitin-triggered MPK phosphorylation and PTI marker gene expression are** 500 **enhanced by *SRN1* or *SRN2* in *C. sativus***

501 As the signaling pathways activated by PAMP perception include the activation of the  
502 mitogen-activated protein kinases, MPK3, MPK4, and MPK6 in *Arabidopsis* (Asai *et al.*  
503 *et al.*, 2002; Ichimura *et al.*, 2006), we assessed the effect of SRN1 and SRN2 on  
504 chitin-triggered MPK phosphorylation in *C. sativus* (Fig. 5a, b). Indeed, SRN1 and  
505 SRN2 expression enhanced phosphorylation of MPKs (p44/42) upon chitin treatment,  
506 whereas the catalytically dead mutants (SRN1<sup>H63A/H114A</sup> and SRN2<sup>H75A/H130A</sup>) did not.

507 It is well known that downstream events after activation of the MPK signaling  
508 cascade by PAMPs include transcriptional up-regulation of certain defense-related  
509 genes, such as *FRK1*, *NHL10*, *CYP82*, and *PHI1* in *Arabidopsis* (Wan *et al.*, 2008).  
510 Therefore, we analyzed the expression of a set of *C. sativus* homologs of these PTI  
511 marker genes. We found that the expression of the *C. sativus* *FRK1* and *NHL10*  
512 homologs, *CsFRK1* and *CsNHL10*, was strongly induced 30 min after chitin treatment  
513 (Supporting Information Fig. S6). Importantly, these mRNAs were further induced by  
514 wild-type SRN1 and SRN2, but not by the catalytic mutants (Fig. 5c, d).

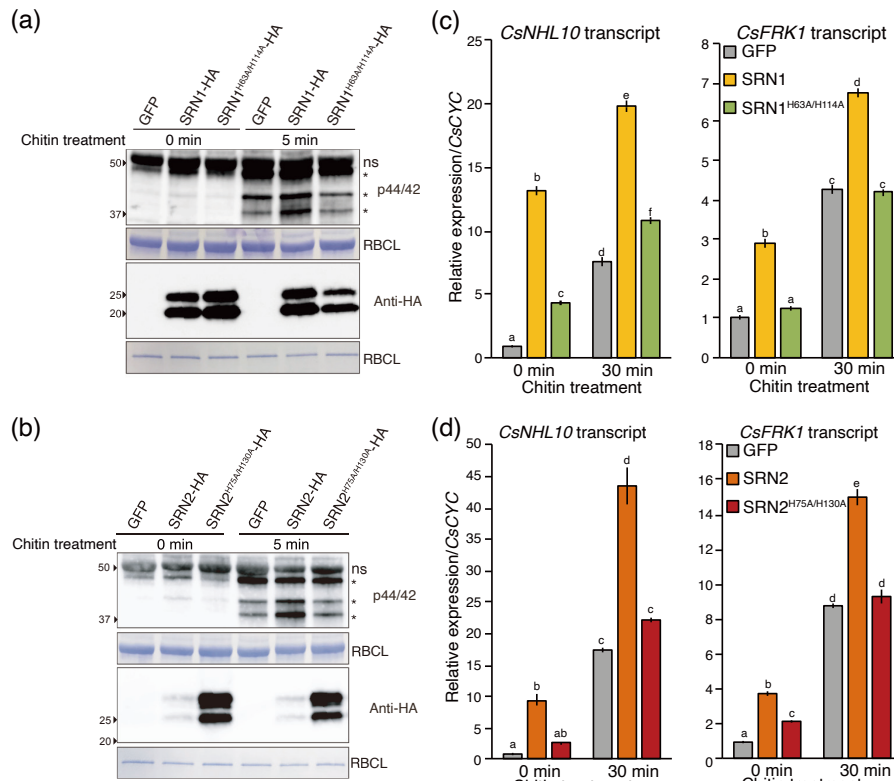

515

516

517 **Figure 5. PTI potentiation by SRN1 and SRN2 expression in *C. sativus***

518 (a) Chitin-treated *C. sativus* cells expressing SRN1-HA showed enhanced MPKs  
 519 phosphorylation. *C. sativus* cotyledons treated with chitin for 0 and 5 min were used.  
 520 GFP, SRN1-HA, or SRN1<sup>H63A/H114A</sup>-HA were expressed in *C. sativus* cotyledons by an  
 521 *Agrobacterium*-mediated transient gene expression system. Upper panel:  
 522 phosphorylation of MPKs was detected using anti-phospho-p44/42 MAPK antibody.  
 523 Lower panel: anti-HA antibody was used. Coomassie-stained RBCL proteins were used  
 524 as loading controls. Similar results were obtained from independent three experiments.  
 525 ns indicates a non-specific band. Asterisks indicate MPKs of *C. sativus*. (b) SRN1-HA  
 526 expression induced PTI marker gene accumulation in *C. sativus* cells, as for SRN1-HA  
 527 in panel (a). (b, d) Accumulation of *CsNHL10* and *CsFRK1* transcripts was quantified  
 528 by RT-qPCR. *CsCYC* was used as endogenous control as established in a previous  
 529 report (Liang *et al.*, 2018). Primers used are listed in Supporting Information Table S3.  
 530 Different lower-case letters indicate significant differences ( $p < 0.05$ , Tukey HSD).  
 531 Data represent mean  $\pm$ SE ( $n=3$ ). Two independent experiments showed similar results.  
 532 (c) Chitin-treated *C. sativus* cells expressing SRN2-HA showed enhanced MPKs  
 533 phosphorylation. The experiment was performed as described in (a). (d) SRN2-HA  
 534 expression induced PTI marker gene accumulation in *C. sativus* cells. The experiment  
 535 was performed as described in (b).

536

537 We note that even in the absence of chitin, SRN1 and SRN2 could lead *CsNHL10* and  
538 *CsFRK1* expression, suggesting the synergistic effects. Overall, these results indicates  
539 that SRN1 and SRN2 potentiate PTI responses in a catalytic residue-dependent manner.

540

541 **SRN1 cleaves ssRNAs at guanosine residues and leaves 3'-phosphates at 5'**  
542 **fragments**

543 To test an enzymatic activity of SRN1 *in vitro*, we utilized *Pichia pastoris*, which can  
544 secrete the recombinant protein outside the cell by secretion signal,  $\alpha$ -factor (Brake *et al.*, 1984). Here we substituted intrinsic signal peptide of SRN1 with the  $\alpha$ -factor.  
545 Indeed, *P. pastoris* successfully expressed SRN1 <sup>$\Delta$ SP</sup> fused with  $\alpha$ -factor at their  
546 N-terminus, however, the amount did not reach enough level for further biochemical  
547 use (data not shown), maybe due to cell toxicity. Therefore, a mutation, H63A, which  
548 could weaken the potential ribonuclease activity and cell toxicity was introduced into  
549 SRN1. H63 corresponds to H58 of *A. oryzae* RNase T1, and it has been reported that  
550 the ribonuclease activity is still detected and the substrate specificity is not affected  
551 when the mutation is introduced (Nishikawa *et al.*, 1987). Indeed, sufficient amounts of  
552 SRN1<sup>H63A/ $\Delta$ SP</sup> protein were obtained for subsequent biochemical analyses. In addition to  
553 the single mutant, we isolated the double mutant (SRN1<sup>H63A/H114A/ $\Delta$ SP</sup>) as a catalytically  
554 dead control.

556 Given that SRN1 homolog RNase T1 cleaves RNAs at guanosine residues  
557 specifically (Nishikawa *et al.*, 1987), we reasoned that SRN1 may have the same  
558 nucleotide specificity. To test this possibility, we use two different ssRNAs as  
559 substrates: adenine/guanine-repeated polypurine RNA (AG10) and  
560 uracil/cytosine-repeated polypyrimidine RNA (UC10), conjugated with fluorescein  
561 (FAM) at their 5' ends (Fig. 6a top). Indeed, SRN1<sup>H63A/ $\Delta$ SP</sup> digested AG10 but not UC10,  
562 indicating its nucleotide specificity toward. In contrast, the catalytically dead  
563 SRN1<sup>H63A/H114A/ $\Delta$ SP</sup> could not cleave the AG10 (Fig. 6a bottom). This reaction did not  
564 require Mg ions, which is a key cofactor for a subset of RNases (Fig. 6a, Supporting  
565 Information Fig. S7a). Titration of enzyme amount allowed us to track the reaction  
566 intermediates, which corresponds to nine fragments of AG10 (Supporting Information  
567 Fig. S7b), suggesting that SRN1 mediated endoribonucleolytic cleavage at adenosine or  
568 guanosine residues, but not both.



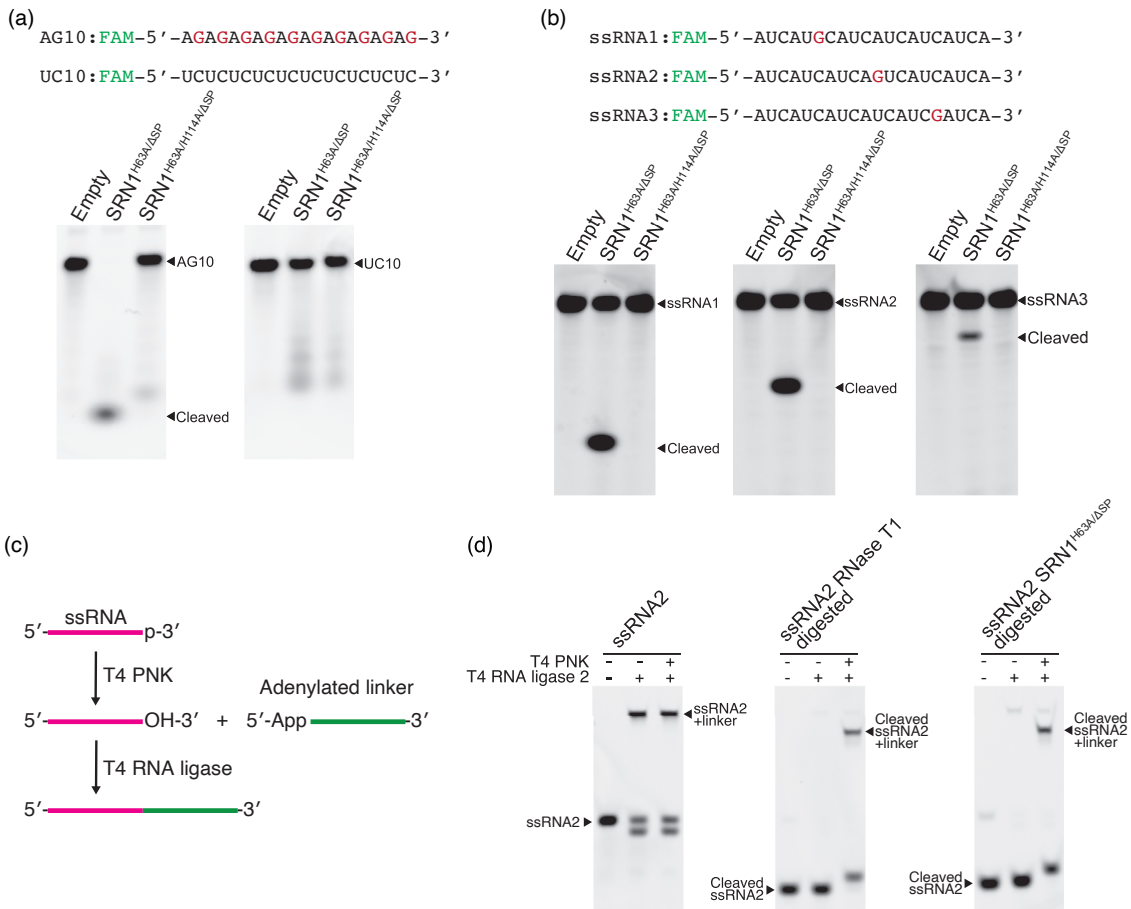

569

570

571 **Figure 6. SRN1 cleaves ssRNAs at guanosine residues in vitro**

572 (a) SRN1<sup>H63A/ΔSP</sup> cleaved AG10, but did not UC10. In vitro RNase assays were  
573 performed with recombinant proteins produced by *P. pastoris* (SRN1<sup>H63A/ΔSP</sup> and  
574 SRN1<sup>H63A/H114A/ΔSP</sup>), and chemically synthesized substrate ssRNAs (AG10 and UC10)  
575 labelled with fluorescein (FAM), at their 5'-termini. (b) SRN1<sup>H63A/ΔSP</sup> cleaves ssRNAs  
576 at guanosine residues. ssRNA1, ssRNA2, and ssRNA3 have one guanosine residue,  
577 respectively, at different sites. ssRNA1, ssRNA2 and ssRNA3 are labelled with FAM at  
578 their 5'-termini. (c) Schematics of ssRNA dephosphorylation and linker ligation for (d).  
579 T4 PNK dephosphorylate 3' end of ssRNA. T4 RNA ligase 2 conjugates the 3'-hydroxyl  
580 end of ssRNA with the pre-adenylated ssDNA linker. (d) 3' end of cleaved ssRNA by  
581 SRN1<sup>H63A/ΔSP</sup> possesses phosphate. ssRNA2 cleaved by SRN1<sup>H63A/ΔSP</sup> was ligated with  
582 the pre-adenylated ssDNA only when the fragment was pre-treated with T4 PNK.

583

584



585           Thus, we tested whether SRN1 cleaves RNAs at guanosine residue using  
586 RNA substrates that only possess single guanosine but different positions (Fig. 6b,  
587 ssRNA1, ssRNA2, and ssRNA3). According to the position of the guanosine,  
588 SRN1<sup>H63A/ΔSP</sup> generated short, middle, and long RNA fragments from ssRNA1, ssRNA2,  
589 and ssRNA3, respectively, showing that SRN1<sup>H63A/ΔSP</sup> cleaves RNA at guanosine (Fig.  
590 6b). We also tested whether SRN1 cleaves double stranded (ds) RNAs (Supplementary  
591 Information Fig. S7c, dsRNA4). Although un-annealed single strand RNA (ssRNA4)  
592 was cleaved by SRN1<sup>H63A/ΔSP</sup> as expected, dsRNA4 was tolerate (Supplementary  
593 Information Fig. S7c). Thus, we concluded that SRN1 is a single-stranded  
594 RNA-specific endoribonuclease that cleaves at guanosine.

595           Considering that endonucleolytic cleavage by RNase T1 results in 3'-end  
596 phosphate at the 5' RNA fragment (Nishikawa *et al.*, 1987), we further investigated the  
597 molecular form of the cleaved end by SRN1. For this purpose, we harnessed the  
598 ligation-based assay; 3' phosphate hampers the ligation to 3' DNA fragment by T4 RNA  
599 ligase 2, whereas 3' hydroxy group is susceptible to the reaction (Fig. 6c). As expected,  
600 the RNA (ssRNA2) that has a 3'-hydroxyl end was ligated (Fig. 6d, left panel). In  
601 contrast, the RNase T1-cleaved RNA could not engage in this ligation reaction unless  
602 the 3' end is dephosphorylated by T4 polynucleotide kinase (PNK) (Fig. 6d, middle  
603 panel). Similarly, SRN1<sup>H63A/ΔSP</sup> generated RNAs in the 3'-end form that could be ligated  
604 only after T4 PNK treatment (Fig. 6d, right panel). The striking correspondence of the  
605 substrate specificity (single stranded guanosine) (Fig. 6b), metal ion independency (Fig.  
606 6a and Supporting Information Fig. S7a), and 3'-end phosphate in the cleaved product  
607 (Fig. 6d) showed that SRN1 functionally resembles RNase T1 (Nishikawa *et al.*, 1987).

608

### 609 **The *srn1 srn2* double mutant strains show increased invasion and relative fungal** 610 **biomass *in planta***

611 To assess the biological relevance of our findings, we established *srn1*, *srn2*, and *srn1*  
612 *srn2* double knockout mutants and performed infection assays. We measured the  
613 invasion ratio, the percentage of successful infection hyphae per appressorium (Fig. 7a),  
614 at the early infection stage when the expression of *SRN1* and *SRN2* is induced (Fig. 3c).  
615 The invasion ratios were significantly increased in the two independent *srn1 srn2*  
616 double mutant strains (Fig. 7b).

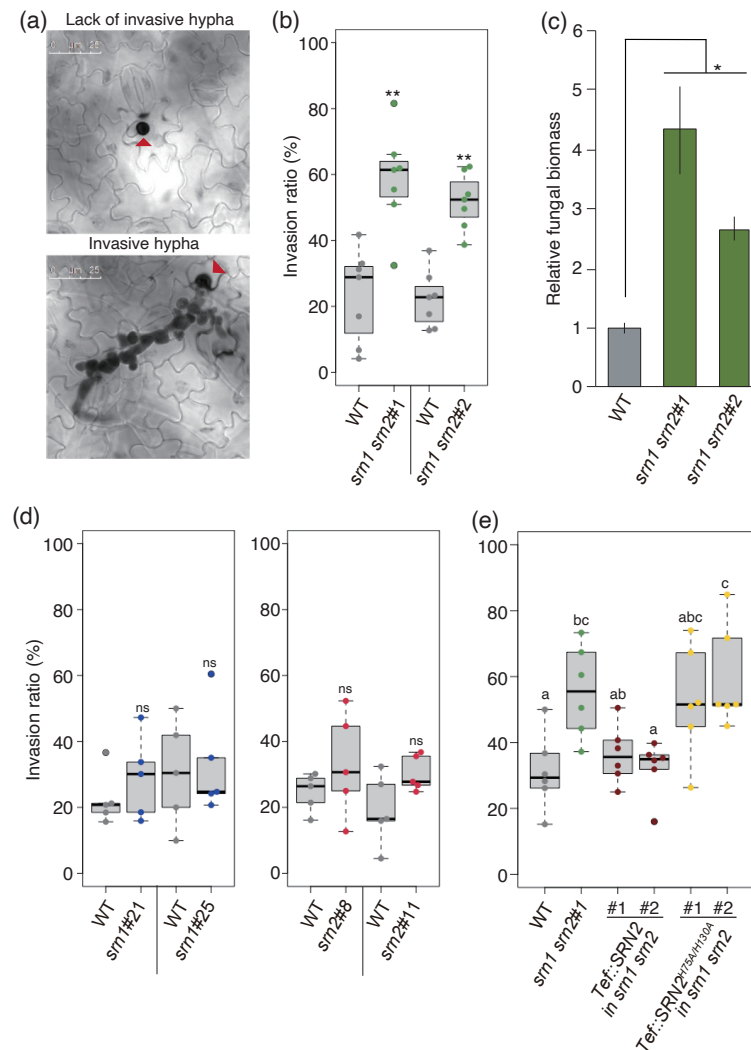

617

618 **Figure 7. *C. orbiculare srn1 srn2* mutants showed increased virulence**

619 (a) Example of lack of invasive hypha (top) and invasive hypha (bottom) formation  
 620 from *C. orbiculare* appressoria. Red arrowheads indicate appressoria. Invasive hypha  
 621 from successfully invaded appressoria were observed in the bottom panel. *C. sativus*  
 622 cotyledons inoculated with *C. orbiculare* were trypan blue stained in both panels. Scale  
 623 bars represent 25  $\mu\text{m}$ . (b and d) Invasion ratio of a series of *srn* mutants on *C. sativus*  
 624 cotyledons at 60 hpi. Leaves were inoculated with 5  $\mu\text{l}$  of conidial suspensions at  $1 \times$   
 625  $10^5$  conidia  $\text{ml}^{-1}$ . Each boxplot includes six to eight replicates. Each replicate was  
 626 calculated using at least 50 appressoria. The box contains data within 1st and 3rd  
 627 quartiles. \*, \*\*, and ns indicate  $p < 0.05$ ,  $p < 0.01$ , and not significant compared to *C.*  
 628 *orbiculare* WT, respectively (t-test). (c) Fungal biomass during infection was quantified  
 629 by RT-qPCR. A section of the ribosomal protein L5 transcript of *C. orbiculare* and a  
 630 section of the *CsCYC* transcript of *C. sativus* were used for quantification. Primers used  
 631 are listed in Supporting Information Table S4. Total RNAs were extracted from

632 cotyledons inoculated either with *C. orbiculare* wild type or two *srn1 srn2* mutant  
633 strains at 88 hpi. \* indicates  $p < 0.05$  (t-test) compared to *C. orbiculare* WT. Data  
634 represent mean  $\pm$ SE (n=6). (e) Overexpression of *SRN2* in *srn1 srn2* reduced the  
635 increased invasion ratio of the *srn1 srn2* mutant. *Tef* promoter-driven *SRN2* or  
636 *SRN2<sup>H75A/H130A</sup>* were expressed in the *srn1 srn2*#1 mutant. The invasion ratio was  
637 measured using the same method as described in (b, d). Different lower-case letters  
638 indicate significant differences ( $p < 0.05$ , Tukey HSD).

639

640 In contrast, the *srn1* and *srn2* single mutants did not significantly alter the invasion  
641 ratios (Fig. 7d), suggesting the redundant functions of *SRN1* and *SRN2*.

642 To further ensure the role of *SRNs* in infection, we overexpressed *SRN2* in  
643 *srn1 srn2* double knockout strain. Here, ectopic *SRN2* was expressed by the promoter of  
644 *Aureobasidium pullulans* *TRANSLATION ELONGATION FACTOR* (*Tef*)  
645 (Wymelenberg *et al.*, 1997). Indeed, the overexpression of *SRN2* in the double  
646 knockout cells (denoted as *Tef::SRN2* in *srn1 srn2*#1 and #2) showed decreased  
647 invasion ratios compared to the parental double knockout mutant (*srn1 srn2*#1) (Fig.  
648 7e). In contrast, catalytic inactive *SRN2* (*Tef::SRN2<sup>H75A/H130A</sup>* in *srn1 srn2*) could not  
649 complement the phenotype (Fig. 7e), suggesting the ribonuclease catalytic residues or  
650 activity are monitored by host to drive the immunity.

651 We also assessed the relative fungal biomass levels, which was probed by *C.*  
652 *orbiculare* transcripts (especially ribosome protein L5), during infection on *C. sativus*  
653 leaves. Consistent with the invasion ratios, *srn1 srn2* double mutants showed  
654 significantly increased fungal biomass (Fig. 7c). Collectively, our data indicates that  
655 *SRN1* and *SRN2* in *C. sativus* enhance defense responses of the host plant to this fungi.

656

## 657 Discussion

658 Plants often perceive the presence of pathogens by recognizing molecules or the  
659 enzymatic activities of proteins originating from pathogens. Here, we report that *C.*  
660 *orbiculare* ribonuclease effectors, *SRN1* and *SRN2*, potentiate typical PTI responses of  
661 *C. sativus* in a manner that is dependent on their catalytic residues and signal peptides.  
662 Our genetic analysis revealed that the *srn1 srn2* double mutants showed increased  
663 invasion ratios and relative fungal biomass (Fig. 7b, c), suggesting that *SRN1* and  
664 *SRN2* can be detrimental to the pathogen. Consistent with this notion, expression of

665 SRN1 and SRN2 in *C. sativus* enhanced chitin-triggered ROS bursts (Fig. 4a) and MPK  
666 phosphorylation (Fig. 5a, b), as well as PTI marker gene expression (Fig. 5c, d). As  
667 these effects require catalytic residues and the signal peptides of SRN1 and SRN2, their  
668 enzymatic activity is likely to be recognized in the outside of the host cells (Fig. 4c, e),  
669 most probably in its apoplastic region. In line with this, in vitro analysis revealed that  
670 SRN1 recombinant proteins have an endoribonuclease activity that specifically cleaves  
671 ssRNAs at guanosine producing oligonucleotides with 3' phosphate.

672 The action of SRN1 and SRN2 is apparently different from that of three  
673 ribonuclease-type effectors reported previously. Firstly, Zt6 from *Zymoseptoria tritici* is  
674 reported to be a host cell death-inducing effector by degrading rRNA in the host cells  
675 (Kettles *et al.*, 2018). In contrast, SRN1 and SNR2 did not induce cell death in their  
676 host, *C. sativus*. In the *N. benthamiana* expression system, SRN2 induced cell death but  
677 their full cell death activity required signal peptide (Supporting Information Fig. S8),  
678 indicating that the effector targets are likely to be apoplastic RNAs, rather than cellular  
679 (r)RNA in the host. Secondly, CSEP0064/BEC1054, one of the 27 *Blumeria graminis*  
680 ribonuclease-like effectors that lack catalytic active residues, acts as a virulence factor  
681 inside the host cells (Pedersen *et al.*, 2012; Pliego *et al.*, 2013). More recently,  
682 Pennington *et al.* (2019) showed that CSEP0064/BEC1054 binds nucleic acids and  
683 inhibits the degradation of host rRNA induced by plant endogenous  
684 ribosome-inactivating proteins (RIPs) (Pennington *et al.*, 2019). Based on these findings,  
685 Pennington *et al.* (2019) proposed that CSEP0064/BEC1054 is a pseudoenzyme that  
686 interacts with host ribosomes and inhibits the action of RIPs. Thirdly, AvrPm2, another  
687 ribonuclease-like protein of *B. graminis*, is recognized by the barley nucleotide-binding,  
688 leucine-rich repeat receptor (NLR) protein, Pm2 in the host cell (Praz *et al.*, 2016),  
689 suggesting that AvrPm2 is a cytoplasmic effector that causes hypersensitive cell death  
690 triggered by an NLR. Thus, these three effectors are all predicted to be cytoplasmic  
691 effectors and are thus different from SRNs.

692 Host-specific cell death (only found in *N. benthamiana* but not in *C. sativus*) by  
693 SRNs expression remains an open question. One plausible explanation is that *N.*  
694 *benthamiana* encodes an as yet unidentified PRR that is able to trigger cell death upon  
695 direct or indirect detection of SRNs. Such cell death-inducing PRRs have been known  
696 in several species including potato and rice (Song *et al.*, 1995; Du *et al.*, 2015). In this

697 scenario, it is also possible that *C. sativus* may encode a similar PRR that can detect the  
698 activity of *SRN1* and *SRN2* in the apoplast but potentiate PTI without causing cell death.  
699 As both signal peptides and catalytic residues of *SRN1* and *SRN2* are required for the  
700 full cell death activity in *N. benthamiana* and for PTI potentiation in *C. sativus*, it is  
701 possible that *SRN1* and *SRN2* cleaves RNAs in the apoplast and the resulting RNA  
702 molecules trigger immune responses via a PRR. In *Arabidopsis*, virus-derived dsRNAs  
703 induce PTI responses via *SERK1*, a receptor like kinase (Niehl *et al.*, 2016). In addition,  
704 bacterial RNAs also induce immune responses in *Arabidopsis* when infiltrated into  
705 leaves (Lee *et al.*, 2016). Thus, plants may be able to perceive certain RNA molecules  
706 in the apoplast. If RNAs are derived from host plants, these molecules may serve as  
707 DAMPs to indirectly detect invasive pathogens secreting specific RNases in the  
708 apoplast. This is a plausible case for SRNs, which are guanosine-specific single-strand  
709 endoribonucleases leaving 3' phosphate, as plants normally do not encode RNases with  
710 this specificity. In mammals, PRRs such as Toll-like receptor (TLR) 3 and TLR7 can  
711 detect virus-derived dsRNA and ssRNAs, respectively (Takeuchi & Akira, 2010;  
712 Alexopoulou *et al.*, 2001; Diebold & Brencicova, 2013). Isolation of such plant PRRs in  
713 the future will help to clarify the similarities and differences between the ways plants  
714 and animals recognize RNA molecules.

715         Why did all the *Colletotrichum* species we investigated encode SRN proteins?  
716 Although we did not detect a virulence function of *SRN1* and *SRN2* in our pathosystem,  
717 these proteins should provide biological advantage to the pathogen. For example, the  
718 function of these proteins is possibly manipulation of the local microbial community, as  
719 shown for *Zt6* (Kettles *et al.*, 2018; Snelders *et al.*, 2018). Alternatively, SRNs target  
720 their own secreted RNAs. Fungal pathogens, such as *Botrytis cinerea*, can secrete small  
721 RNAs as effectors suppressing host immune responses (Weiberg *et al.*, 2013). Thus,  
722 SRNs could be used to process such RNAs, which may serve as PAMPs when the host  
723 contains corresponding PRRs. However, if this is the case, it is difficult to explain why  
724 transient expression of SRNs in the host in the absence of a pathogen can induce  
725 immune responses. In addition, if SRNs are involved in the production of pathogen  
726 RNA effectors, the knockout phenotype is predicted to reduce virulence. However, the  
727 phenotype we observed was gain of virulence (Fig. 7). Another possibility is that SRNs  
728 target host apoplastic RNAs. *A. thaliana* apoplastic fluid contains both sRNAs and

729 lncRNAs associated with proteins (Karimi *et al.*, 2021). sRNAs of host plants were also  
730 detected in *Verticillium dahliae* and could down-regulate virulence-related genes  
731 (Zhang *et al.*, 2016). Thus, such host-derived defensive apoplastic RNAs can be  
732 potential targets of SRNs. In this scenario, degrading host RNAs should increase  
733 pathogen virulence *per se*. Such virulence effects of SRNs may be observed in a host  
734 that is not able to detect the ribonuclease activity of SRNs. The identification of the  
735 target RNAs of SRNs will further clarify RNA-mediated plant-microbe interactions.

736

### 737 **Acknowledgements**

738 We thank Drs. Satoko Nonaka and Hiroshi Ezura for providing the pBBR*gabT* plasmid,  
739 Drs. Mikiko Sodeoka and Kosuke Dodo for sharing equipment, and Dr. Yasuhiro  
740 Kadota for critical reading of the manuscript. This work was supported by Cooperative  
741 Research Grant of the Plant Transgenic Design Initiative (PTraD) by Gene Research  
742 Center, Tsukuba-Plant Innovation Research Center (University of Tsukuba), RIKEN  
743 Special Postdoctoral Researcher Program (NK), JSPS KAKENHI JP18K14440 and  
744 JP20K15500 (NK), JP19K15846 (PG), JP17J02983 (AT), JP21H05032 (YT),  
745 JP17H06172 (KS), JP19H02959 (SI), JST ACT-X Grant number JPMJAX20 (NK), The  
746 Program for Promotion of Basic and Applied Researches for Innovations in  
747 Bio-oriented Industry (BRAIN; 10103721) (KS), Council for Science, Technology and  
748 Innovation (CSTI) (KS), and Cross-ministerial Strategic Innovation Promotion Program  
749 (SIP) (YN, YT, and KS) “Technologies for creating next-generation agriculture,  
750 forestry and fisheries”. The authors declare no conflicts of interest associated with this  
751 manuscript.

752

### 753 **Author Contributions**

754 NK, SO, YT, and KS designed the research. NK, SO, and MN performed experiments.  
755 PG and AT analyzed genome and transcriptome data. NK, NI, SW and MS prepared  
756 recombinant proteins. NK and SI performed *in vitro* analysis. YN, YT, and KS  
757 supervised the project. NK, PG, and KS wrote the manuscript with the edition from all  
758 the authors.

759

### 760 **Data Availability Statement**



761 The data that supports the findings of this study are available in the supplementary  
762 material of this article or from the corresponding author upon reasonable request.

763

## 764 **References**

765 **Alexopoulou L, Holt AC, Medzhitov R, Flavell RA. 2001.** Recognition of  
766 double-stranded RNA and activation of NF- $\kappa$ B by Toll-like receptor 3. *Nature* **413**:  
767 732–738.

768 **Amselem J, Cuomo CA, Kan JAL van, Viaud M, Benito EP, Couloux A, Coutinho**  
769 **PM, Vries RP de, Dyer PS, Fillinger S, *et al.* 2011.** Genomic analysis of the  
770 necrotrophic fungal pathogens *Sclerotinia sclerotiorum* and *Botrytis cinerea*. *PLOS*  
771 *Genetics* **7**: e1002230.

772 **Arnaud MB, Cerqueira GC, Inglis DO, Skrzypek MS, Binkley J, Chibucos MC,**  
773 **Crabtree J, Howarth C, Orvis J, Shah P, *et al.* 2012.** The *Aspergillus* Genome  
774 Database (AspGD): recent developments in comprehensive multispecies curation,  
775 comparative genomics and community resources. *Nucleic Acids Research* **40**:  
776 D653–D659.

777 **Asai T, Tena G, Plotnikova J, Willmann MR, Chiu W-L, Gomez-Gomez L, Boller**  
778 **T, Ausubel FM, Sheen J. 2002.** MAP kinase signalling cascade in *Arabidopsis* innate  
779 immunity. *Nature* **415**: 977–983.

780 **Baldrich P, Rutter BD, Karimi HZ, Podicheti R, Meyers BC, Innes RW. 2019.**  
781 Plant extracellular vesicles contain diverse small RNA species and are enriched in 10-  
782 to 17-nucleotide “tiny” RNAs. *The Plant Cell* **31**: 315–324.

783 **Baroncelli R, Amby DB, Zapparata A, Sarrocco S, Vannacci G, Le Floch G,**  
784 **Harrison RJ, Holub E, Sukno SA, Sreenivasaprasad S, *et al.* 2016.** Gene family  
785 expansions and contractions are associated with host range in plant pathogens of the  
786 genus *Colletotrichum*. *BMC Genomics* **17**: 555.

787 **Baroncelli R, Sreenivasaprasad S, Sukno SA, Thon MR, Holub E. 2014.** Draft  
788 genome sequence of *Colletotrichum acutatum sensu lato* (*Colletotrichum fioriniae*).  
789 *Genome Announcements* **2**: e00112-14.

790 **Beimforde C, Feldberg K, Nylinder S, Rikkinen J, Tuovila H, Dörfelt H, Gube M,**  
791 **Jackson DJ, Reitner J, Seyfullah LJ, *et al.* 2014.** Estimating the Phanerozoic history  
792 of the Ascomycota lineages: Combining fossil and molecular data. *Molecular*  
793 *Phylogenetics and Evolution* **78**: 386–398.

794 **Berka RM, Grigoriev IV, Otilar R, Salamov A, Grimwood J, Reid I, Ishmael N,**  
795 **John T, Darmond C, Moisan M-C, *et al.* 2011.** Comparative genomic analysis of the  
796 thermophilic biomass-degrading fungi *Myceliophthora thermophila* and *Thielavia*  
797 *terrestris*. *Nature Biotechnology* **29**: 922–927.

798 **Blanco-Ulate B, Rolshausen PE, Cantu D. 2013.** Draft genome sequence of the  
799 grapevine dieback fungus *Eutypa lata* UCR-EL1. *Genome Announcements* **1**:  
800 e00228-13.

801 **Boutrot F, Zipfel C. 2017.** Function, discovery, and exploitation of plant pattern  
802 recognition receptors for broad-spectrum disease resistance. *Annual Review of*  
803 *Phytopathology* **55**: 257–286.



- 804 **Brake AJ, Merryweather JP, Coit DG, Heberlein UA, Masiarz FR, Mullenbach**  
805 **GT, Urdea MS, Valenzuela P, Barr PJ. 1984.** Alpha-factor-directed synthesis and  
806 secretion of mature foreign proteins in *Saccharomyces cerevisiae*. *Proceedings of the*  
807 *National Academy of Sciences, USA* **81**: 4642–4646.
- 808 **Cai Q, Qiao L, Wang M, He B, Lin F-M, Palmquist J, Huang H-D, Jin H. 2018.**  
809 Plants send small RNAs in extracellular vesicles to fungal pathogen to silence virulence  
810 genes. *Science*: eaar4142.
- 811 **Cannon PF, Damm U, Johnston PR, Weir BS. 2012.** *Colletotrichum* – current status  
812 and future directions. *Studies in Mycology* **73**: 181–213.
- 813 **Capella-Gutiérrez S, Silla-Martínez JM, Gabaldón T. 2009.** trimAl: a tool for  
814 automated alignment trimming in large-scale phylogenetic analyses. *Bioinformatics* **25**:  
815 1972–1973.
- 816 **Chen J, Inoue Y, Kumakura N, Mise K, Shirasu K, Takano Y. 2021.** Comparative  
817 transient expression analyses on two conserved effectors of *Colletotrichum orbiculare*  
818 reveal their distinct cell death-inducing activities between *Nicotiana benthamiana* and  
819 melon. *Molecular Plant Pathology* in press.
- 820 **Cissé OH, Almeida JMGCF, Fonseca Á, Kumar AA, Salojärvi J, Overmyer K,**  
821 **Hauser PM, Pagni M. 2013.** Genome sequencing of the plant pathogen *Taphrina*  
822 *deformans*, the causal agent of peach leaf curl. *mBio* **4**: e00055-13.
- 823 **Coleman JJ, Rounsley SD, Rodriguez-Carres M, Kuo A, Wasmann CC,**  
824 **Grimwood J, Schmutz J, Taga M, White GJ, Zhou S, et al. 2009.** The genome of  
825 *Nectria haematococca*: contribution of supernumerary chromosomes to gene expansion.  
826 *PLOS Genetics* **5**: e1000618.
- 827 **Cuomo CA, Güldener U, Xu J-R, Trail F, Turgeon BG, Pietro AD, Walton JD, Ma**  
828 **L-J, Baker SE, Rep M, et al. 2007.** The *Fusarium graminearum* genome reveals a link  
829 between localized polymorphism and pathogen specialization. *Science* **317**: 1400–1402.
- 830 **Dean R, Kan V, L JA, Pretorius ZA, Hammond-Kosack KE, Di Pietro A, Spanu**  
831 **PD, Rudd JJ, Dickman M, Kahmann R, et al. 2012.** The Top 10 fungal pathogens in  
832 molecular plant pathology. *Molecular Plant Pathology* **13**: 414–430.
- 833 **Dean RA, Talbot NJ, Ebbole DJ, Farman ML, Mitchell TK, Orbach MJ, Thon M,**  
834 **Kulkarni R, Xu J-R, Pan H, et al. 2005.** The genome sequence of the rice blast fungus  
835 *Magnaporthe grisea*. *Nature* **434**: 980–986.
- 836 **Diebold SS, Brencicova E. 2013.** Nucleic acids and endosomal pattern recognition:  
837 how to tell friend from foe? *Frontiers in Cellular and Infection Microbiology* **3**.
- 838 **Dixon MS, Golstein C, Thomas CM, Biezen EA van der, Jones JDG. 2000.** Genetic  
839 complexity of pathogen perception by plants: The example of Rcr3, a tomato gene  
840 required specifically by Cf-2. *Proceedings of the National Academy of Sciences, USA*  
841 **97**: 8807–8814.
- 842 **Du J, Verzaux E, Chaparro-Garcia A, Bijsterbosch G, Keizer LCP, Zhou J,**  
843 **Liebrand TWH, Xie C, Govers F, Robotzek S, et al. 2015.** Elicitin recognition  
844 confers enhanced resistance to *Phytophthora infestans* in potato. *Nature Plants* **1**:  
845 15034.
- 846 **Duplessis S, Cuomo CA, Lin Y-C, Aerts A, Tisserant E, Veneault-Fourrey C, Joly**  
847 **DL, Hacquard S, Amselem J, Cantarel BL, et al. 2011.** Obligate biotrophy features

- 848 unraveled by the genomic analysis of rust fungi. *Proceedings of the National Academy*  
849 *of Sciences, USA* **108**: 9166–9171.
- 850 **Eddy SR. 2011.** Accelerated profile HMM searches. *PLOS Computational Biology* **7**:  
851 e1002195.
- 852 **Espagne E, Lespinet O, Malagnac F, Da Silva C, Jaillon O, Porcel BM, Couloux A,**  
853 **Aury J-M, Ségurens B, Poulain J, et al. 2008.** The genome sequence of the model  
854 ascomycete fungus *Podospora anserina*. *Genome Biology* **9**: R77.
- 855 **Finn RD, Bateman A, Clements J, Coggill P, Eberhardt RY, Eddy SR, Heger A,**  
856 **Hetherington K, Holm L, Mistry J, et al. 2014.** Pfam: the protein families database.  
857 *Nucleic Acids Research* **42**: D222–D230.
- 858 **Galagan JE, Calvo SE, Borkovich KA, Selker EU, Read ND, Jaffe D, FitzHugh W,**  
859 **Ma L-J, Smirnov S, Purcell S, et al. 2003.** The genome sequence of the filamentous  
860 fungus *Neurospora crassa*. *Nature* **422**: 859.
- 861 **Gan P, Hiroyama R, Tsushima A, Masuda S, Shibata A, Ueno A, Kumakura N,**  
862 **Narusaka M, Hoat TX, Narusaka Y, et al. 2021.** Telomeres and a repeat-rich  
863 chromosome encode effector gene clusters in plant pathogenic *Colletotrichum* fungi.  
864 *Environmental Microbiology* doi: 10.1111/1462-2920.15490.
- 865 **Gan P, Ikeda K, Irieda H, Narusaka M, O’Connell RJ, Narusaka Y, Takano Y,**  
866 **Kubo Y, Shirasu K. 2013.** Comparative genomic and transcriptomic analyses reveal  
867 the hemibiotrophic stage shift of *Colletotrichum* fungi. *New Phytologist* **197**:  
868 1236–1249.
- 869 **Gan P, Narusaka M, Kumakura N, Tsushima A, Takano Y, Narusaka Y, Shirasu**  
870 **K. 2016.** Genus-wide comparative genome analyses of *Colletotrichum* species reveal  
871 specific gene family losses and gains during adaptation to specific infection lifestyles.  
872 *Genome Biology and Evolution* **8**: 1467–1481.
- 873 **Gan P, Narusaka M, Tsushima A, Narusaka Y, Takano Y, Shirasu K. 2017.** Draft  
874 genome assembly of *Colletotrichum chlorophyti*, a pathogen of herbaceous plants.  
875 *Genome Announcements* **5**: e01733-16.
- 876 **Gazis R, Kuo A, Riley R, LaButti K, Lipzen A, Lin J, Amirebrahimi M, Hesse CN,**  
877 **Spatafora JW, Henrissat B, et al. 2016.** The genome of *Xylona heveae* provides a  
878 window into fungal endophytism. *Fungal Biology* **120**: 26–42.
- 879 **Goffeau A, Barrell BG, Bussey H, Davis RW, Dujon B, Feldmann H, Galibert F,**  
880 **Hoheisel JD, Jacq C, Johnston M, et al. 1996.** Life with 6000 genes. *Science* **274**:  
881 546–567.
- 882 **Goodwin SB, M’Barek SB, Dhillon B, Wittenberg AHJ, Crane CF, Hane JK,**  
883 **Foster AJ, Lee TAJV der, Grimwood J, Aerts A, et al. 2011.** Finished genome of the  
884 fungal wheat pathogen *Mycosphaerella graminicola* reveals dispensome structure,  
885 chromosome plasticity, and stealth pathogenesis. *PLOS Genetics* **7**: e1002070.
- 886 **Gupta R, Brunak S. 2002.** Prediction of glycosylation across the human proteome and  
887 the correlation to protein function. *Pacific Symposium on Biocomputing. Pacific*  
888 *Symposium on Biocomputing*: 310–322.
- 889 **Hacquard S, Kracher B, Hiruma K, Münch PC, Garrido-Oter R, Thon MR,**  
890 **Weimann A, Damm U, Dallery J-F, Hainaut M, et al. 2016.** Survival trade-offs in

- 891 plant roots during colonization by closely related beneficial and pathogenic fungi.  
892 *Nature Communications* **7**: 11362.
- 893 **Hu X, Xiao G, Zheng P, Shang Y, Su Y, Zhang X, Liu X, Zhan S, St. Leger RJ,**  
894 **Wang C. 2014.** Trajectory and genomic determinants of fungal-pathogen speciation and  
895 host adaptation. *Proceedings of the National Academy of Sciences, USA* **111**:  
896 16796–16801.
- 897 **Ichimura K, Casais C, Peck SC, Shinozaki K, Shirasu K. 2006.** MEKK1 is required  
898 for MPK4 activation and regulates tissue-specific and temperature-dependent cell death  
899 in *Arabidopsis*. *Journal of Biological Chemistry* **281**: 36969–36976.
- 900 **Irieda H, Inoue Y, Mori M, Yamada K, Oshikawa Y, Saitoh H, Uemura A,**  
901 **Terauchi R, Kitakura S, Kosaka A, et al. 2019.** Conserved fungal effector suppresses  
902 PAMP-triggered immunity by targeting plant immune kinases. *Proceedings of the*  
903 *National Academy of Sciences, USA* **116**: 496–505.
- 904 **Kadota Y, Liebrand TWH, Goto Y, Sklenar J, Derbyshire P, Menke FLH, Torres**  
905 **M-A, Molina A, Zipfel C, Coaker G, et al. 2018.** Quantitative phosphoproteomic  
906 analysis reveals common regulatory mechanisms between effector- and  
907 PAMP-triggered immunity in plants. *New Phytologist* **221**: 2160–2175.
- 908 **Kämper J, Kahmann R, Bölker M, Ma L-J, Brefort T, Saville BJ, Banuett F,**  
909 **Kronstad JW, Gold SE, Müller O, et al. 2006.** Insights from the genome of the  
910 biotrophic fungal plant pathogen *Ustilago maydis*. *Nature* **444**: 97–101.
- 911 **Karimi HZ, Baldrich P, Rutter BD, Borniego L, Zajt KK, Meyers BC, Innes RW.**  
912 **2021.** *Arabidopsis* apoplastic fluid contains sRNA- and circular RNA-protein  
913 complexes that are located outside extracellular vesicles. *bioRxiv* doi:  
914 10.1101/2021.10.02.462881.
- 915 **Katoh K, Misawa K, Kuma K, Miyata T. 2002.** MAFFT: a novel method for rapid  
916 multiple sequence alignment on fast Fourier transform. *Nucleic Acids Research* **30**:  
917 3059–3066.
- 918 **Kettles GJ, Bayon C, Sparks CA, Canning G, Kanyuka K, Rudd JJ. 2018.**  
919 Characterization of an antimicrobial and phytotoxic ribonuclease secreted by the fungal  
920 wheat pathogen *Zymoseptoria tritici*. *New Phytologist* **217**: 320–331.
- 921 **Kleemann J, Rincon-Rivera LJ, Takahara H, Neumann U, Themaat EVL van,**  
922 **Does HC van der, Hacquard S, Stüber K, Will I, Schmalenbach W, et al. 2012.**  
923 Sequential delivery of host-induced virulence effectors by appressoria and intracellular  
924 hyphae of the phytopathogen *Colletotrichum higginsianum*. *PLOS Pathogens* **8**:  
925 e1002643.
- 926 **Klosterman SJ, Subbarao KV, Kang S, Veronese P, Gold SE, Thomma BPHJ,**  
927 **Chen Z, Henrissat B, Lee Y-H, Park J, et al. 2011.** Comparative genomics yields  
928 insights into niche adaptation of plant vascular wilt pathogens. *PLOS Pathogens* **7**:  
929 e1002137.
- 930 **Kubicek CP, Herrera-Estrella A, Seidl-Seiboth V, Martinez DA, Druzhinina IS,**  
931 **Thon M, Zeilinger S, Casas-Flores S, Horwitz BA, Mukherjee PK, et al. 2011.**  
932 Comparative genome sequence analysis underscores mycoparasitism as the ancestral  
933 life style of *Trichoderma*. *Genome Biology* **12**: R40.

- 934 **Kumakura N, Ueno A, Shirasu K. 2019.** Establishment of a selection marker  
935 recycling system for sequential transformation of the plant-pathogenic fungus  
936 *Colletotrichum orbiculare*. *Molecular Plant Pathology* **20**: 447–459.
- 937 **Kumar S, Stecher G, Tamura K. 2016.** MEGA7: Molecular evolutionary genetics  
938 analysis version 7.0 for bigger datasets. *Molecular Biology and Evolution* **33**:  
939 1870–1874.
- 940 **Lee B, Park Y-S, Lee S, Song GC, Ryu C-M. 2016.** Bacterial RNAs activate innate  
941 immunity in Arabidopsis. *New Phytologist* **209**: 785–797.
- 942 **Letunic I, Bork P. 2016.** Interactive tree of life (iTOL) v3: an online tool for the  
943 display and annotation of phylogenetic and other trees. *Nucleic Acids Research* **44**:  
944 W242–W245.
- 945 **Li L, Stoeckert CJ, Roos DS. 2003.** OrthoMCL: identification of ortholog groups for  
946 eukaryotic genomes. *Genome research* **13**: 2178–2189.
- 947 **Liang C, Hao J, Meng Y, Luo L, Li J. 2018.** Identifying optimal reference genes for  
948 the normalization of microRNA expression in cucumber under viral stress. *PLOS ONE*  
949 **13**: e0194436.
- 950 **Loftus BJ, Fung E, Roncaglia P, Rowley D, Amedeo P, Bruno D, Vamathevan J,**  
951 **Miranda M, Anderson IJ, Fraser JA, et al. 2005.** The genome of the  
952 Basidiomycetous yeast and Human Pathogen *Cryptococcus neoformans*. *Science* **307**:  
953 1321–1324.
- 954 **Marchler-Bauer A, Bo Y, Han L, He J, Lanczycki CJ, Lu S, Chitsaz F, Derbyshire**  
955 **MK, Geer RC, Gonzales NR, et al. 2017.** CDD/SPARCLE: functional classification of  
956 proteins via subfamily domain architectures. *Nucleic Acids Research* **45**: D200–D203.
- 957 **Martin F, Kohler A, Murat C, Balestrini R, Coutinho PM, Jaillon O, Montanini B,**  
958 **Morin E, Noel B, Percudani R, et al. 2010.** Périgord black truffle genome uncovers  
959 evolutionary origins and mechanisms of symbiosis. *Nature* **464**: 1033–1038.
- 960 **Mistry J, Chuguransky S, Williams L, Qureshi M, Salazar GA, Sonnhammer ELL,**  
961 **Tosatto SCE, Paladin L, Raj S, Richardson LJ, et al. 2021.** Pfam: The protein  
962 families database in 2021. *Nucleic Acids Research* **49**: D412–D419.
- 963 **Mito M, Mishima Y, Iwasaki S. 2020.** Protocol for disome profiling to survey  
964 ribosome collision in humans and zebrafish. *STAR Protocols* **1**: 100168.
- 965 **Niehl A, Wyrsh I, Boller T, Heinlein M. 2016.** Double-stranded RNAs induce a  
966 pattern-triggered immune signaling pathway in plants. *New Phytologist* **211**:  
967 1008–1019.
- 968 **Nishikawa S, Morioka H, Kim HJ, Fuchimura K, Tanaka T, Uesugi S, Hakoshima**  
969 **T, Tomita K, Ohtsuka E, Ikehara M. 1987.** Two histidine residues are essential for  
970 ribonuclease T1 activity as is the case for ribonuclease A. *Biochemistry* **26**: 8620–8624.
- 971 **Noguchi S, Satow Y, Uchida T, Sasaki C, Matsuzaki T. 1995.** Crystal structure of  
972 *Ustilago sphaerogena* ribonuclease U2 at 1.8 Å resolution. *Biochemistry* **34**:  
973 15583–15591.
- 974 **Nonaka S, Someya T, Zhou S, Takayama M, Nakamura K, Ezura H. 2017.** An  
975 *Agrobacterium tumefaciens* strain with gamma-aminobutyric acid transaminase activity  
976 shows an enhanced genetic transformation ability in plants. *Scientific Reports* **7**.



- 977 **O’Connell RJ, Thon MR, Hacquard S, Amyotte SG, Kleemann J, Torres MF,**  
978 **Damm U, Buiate EA, Epstein L, Alkan N, *et al.* 2012.** Lifestyle transitions in plant  
979 pathogenic *Colletotrichum* fungi deciphered by genome and transcriptome analyses.  
980 *Nature Genetics* **44**: 1060–1065.
- 981 **Pedersen C, van Themaat EVL, McGuffin LJ, Abbott JC, Burgis TA, Barton G,**  
982 **Bindschedler LV, Lu X, Maekawa T, Weßling R, *et al.* 2012.** Structure and evolution  
983 of barley powdery mildew effector candidates. *BMC Genomics* **13**: 694.
- 984 **Pennington HG, Jones R, Kwon S, Bonciani G, Thieron H, Chandler T, Luong P,**  
985 **Morgan SN, Przydacz M, Bozkurt T, *et al.* 2019.** The fungal ribonuclease-like  
986 effector protein CSEP0064/BEC1054 represses plant immunity and interferes with  
987 degradation of host ribosomal RNA. *PLOS Pathogens* **15**: e1007620.
- 988 **Petersen TN, Brunak S, von Heijne G, Nielsen H. 2011.** SignalP 4.0: discriminating  
989 signal peptides from transmembrane regions. *Nature Methods* **8**: 785–786.
- 990 **Pliego C, Nowara D, Bonciani G, Gheorghe DM, Xu R, Surana P, Whigham E,**  
991 **Nettleton D, Bogdanove AJ, Wise RP, *et al.* 2013.** Host-induced gene silencing in  
992 barley powdery mildew reveals a class of ribonuclease-like effectors. *Molecular*  
993 *Plant-Microbe Interactions* **26**: 633–642.
- 994 **Praz CR, Bourras S, Zeng F, Sánchez-Martín J, Menardo F, Xue M, Yang L,**  
995 **Roffler S, Böni R, Herren G, *et al.* 2016.** *AvrPm2* encodes an RNase-like avirulence  
996 effector which is conserved in the two different specialized forms of wheat and rye  
997 powdery mildew fungus. *New Phytologist* **213**: 1301–1314.
- 998 **Rambaut, Andrew.** FigTree. *Molecular evolution, phylogenetics and epidemiology.*
- 999 **Rooney HCE, Klooster JW van’t, Hoorn RAL van der, Joosten MHAJ, Jones JDG,**  
1000 **Wit PJGM de. 2005.** Cladosporium *Avr2* inhibits tomato *Rcr3* protease required for  
1001 *Cf-2*-dependent disease resistance. *Science* **308**: 1783–1786.
- 1002 **Rouxel T, Grandaubert J, Hane JK, Hoede C, van de Wouw AP, Couloux A,**  
1003 **Dominguez V, Anthouard V, Bally P, Bourras S, *et al.* 2011.** Effector diversification  
1004 within compartments of the *Leptosphaeria maculans* genome affected by  
1005 repeat-Induced point mutations. *Nature Communications* **2**: 202.
- 1006 **Sainsbury F, Thuenemann EC, Lomonossoff GP. 2009.** pEAQ: versatile expression  
1007 vectors for easy and quick transient expression of heterologous proteins in plants. *Plant*  
1008 *Biotechnology Journal* **7**: 682–693.
- 1009 **Sanderson MJ. 2003.** r8s: inferring absolute rates of molecular evolution and  
1010 divergence times in the absence of a molecular clock. *Bioinformatics* **19**: 301–302.
- 1011 **Shahid S, Kim G, Johnson NR, Wafula E, Wang F, Coruh C, Bernal-Galeano V,**  
1012 **Phifer T, dePamphilis CW, Westwood JH, *et al.* 2018.** MicroRNAs from the parasitic  
1013 plant *Cuscuta campestris* target host messenger RNAs. *Nature* **553**: 82–85.
- 1014 **Snelders NC, Kettles GJ, Rudd JJ, Thomma BPHJ. 2018.** Plant pathogen effector  
1015 proteins as manipulators of host microbiomes? *Molecular Plant Pathology* **19**:  
1016 257–259.
- 1017 **Song W-Y, Wang G-L, Chen L-L, Kim H-S, Pi L-Y, Holsten T, Gardner J, Wang**  
1018 **B, Zhai W-X, Zhu L-H, *et al.* 1995.** A receptor kinase-like protein encoded by the rice  
1019 disease resistance gene, *Xa21*. *Science* **270**: 1804–1806.

- 1020 **Spanu PD, Abbott JC, Amselem J, Burgis TA, Soanes DM, Stüber K, Themaat**  
1021 **EVL van, Brown JKM, Butcher SA, Gurr SJ, *et al.* 2010.** Genome expansion and  
1022 gene loss in powdery mildew fungi reveal tradeoffs in extreme parasitism. *Science* **330**:  
1023 1543–1546.
- 1024 **Stamatakis A. 2006.** RAxML-VI-HPC: maximum likelihood-based phylogenetic  
1025 analyses with thousands of taxa and mixed models. *Bioinformatics* **22**: 2688–2690.
- 1026 **Takahara H, Dolf A, Endl E, O’Connell R. 2009.** Flow cytometric purification of  
1027 *Colletotrichum higginsianum* biotrophic hyphae from Arabidopsis leaves for  
1028 stage-specific transcriptome analysis. *The Plant Journal* **59**: 672–683.
- 1029 **Takeuchi O, Akira S. 2010.** Pattern recognition receptors and inflammation. *Cell* **140**:  
1030 805–820.
- 1031 **Tang D, Wang G, Zhou J-M. 2017.** Receptor kinases in plant-pathogen interactions:  
1032 more than pattern recognition. *The Plant Cell* **29**: 618–637.
- 1033 **Tisserant E, Malbreil M, Kuo A, Kohler A, Symeonidi A, Balestrini R, Charron P,**  
1034 **Duensing N, Frei dit Frey N, Gianinazzi-Pearson V, *et al.* 2013.** Genome of an  
1035 arbuscular mycorrhizal fungus provides insight into the oldest plant symbiosis.  
1036 *Proceedings of the National Academy of Sciences, USA* **110**: 20117–20122.
- 1037 **Torres MA, Jones JDG, Dangl JL. 2006.** Reactive oxygen species signaling in  
1038 response to pathogens. *Plant Physiology* **141**: 373–378.
- 1039 **Tsushima A, Gan P, Kumakura N, Narusaka M, Takano Y, Narusaka Y, Shirasu**  
1040 **K. 2019.** Genomic plasticity mediated by transposable elements in the plant pathogenic  
1041 fungus *Colletotrichum higginsianum*. *Genome Biology and Evolution* **11**: 1487–1500.
- 1042 **Tsushima A, Narusaka M, Gan P, Kumakura N, Hiroyama R, Kato N, Takahashi**  
1043 **S, Takano Y, Narusaka Y, Shirasu K. 2021.** The conserved *Colletotrichum* spp.  
1044 effector candidate CEC3 induces nuclear expansion and cell death in plants. *Frontiers*  
1045 *in Microbiology* **12**: 2535.
- 1046 **Wan J, Zhang X-C, Neece D, Ramonell KM, Clough S, Kim S, Stacey MG, Stacey**  
1047 **G. 2008.** A LysM receptor-like kinase plays a critical role in chitin signaling and fungal  
1048 resistance in *Arabidopsis*. *The Plant Cell* **20**: 471–481.
- 1049 **Wang M, Weiberg A, Lin F-M, Thomma BPHJ, Huang H-D, Jin H. 2016.**  
1050 Bidirectional cross-kingdom RNAi and fungal uptake of external RNAs confer plant  
1051 protection. *Nature Plants* **2**: 16151.
- 1052 **Weiberg A, Wang M, Lin F-M, Zhao H, Zhang Z, Kaloshian I, Huang H-D, Jin H.**  
1053 **2013.** Fungal small RNAs suppress plant immunity by hijacking host RNA interference  
1054 pathways. *Science* **342**: 118–123.
- 1055 **Win J, Chaparro-Garcia A, Belhaj K, Saunders DGO, Yoshida K, Dong S,**  
1056 **Schorneck S, Zipfel C, Robatzek S, Hogenhout SA, *et al.* 2012.** Effector biology of  
1057 plant-associated organisms: concepts and perspectives. *Cold Spring Harbor Symposia*  
1058 *on Quantitative Biology* **77**: 235–247.
- 1059 **Wymelenberg AJ vanden, Cullen D, Spear RN, Schoenike B, Andrews JH. 1997.**  
1060 Expression of green fluorescent protein in *Aureobasidium pullulans* and quantification  
1061 of the fungus on leaf surfaces. *Biotechniques* **23**: 686–690.

- 1062 **Yang J, Wang L, Ji X, Feng Y, Li X, Zou C, Xu J, Ren Y, Mi Q, Wu J, et al. 2011.**  
1063 Genomic and proteomic analyses of the fungus *Arthrobotrys oligospora* provide  
1064 insights into nematode-trap formation. *PLoS Pathogens* **7**: e1002179.
- 1065 **Yoshino K, Irieda H, Sugimoto F, Yoshioka H, Okuno T, Takano Y. 2012.** Cell  
1066 death of *Nicotiana benthamiana* is induced by secreted protein NIS1 of *Colletotrichum*  
1067 *orbiculare* and is suppressed by a homologue of CgDN3. *Molecular Plant-Microbe*  
1068 *Interactions* **25**: 625–636.
- 1069 **Zampounis A, Pigné S, Dallery J-F, Wittenberg AHJ, Zhou S, Schwartz DC, Thon**  
1070 **MR, O’Connell RJ. 2016.** Genome sequence and annotation of *Colletotrichum*  
1071 *higginsianum*, a causal agent of crucifer anthracnose disease. *Genome Announcements*  
1072 **4**: e00821-16.
- 1073 **Zhang T, Zhao Y-L, Zhao J-H, Wang S, Jin Y, Chen Z-Q, Fang Y-Y, Hua C-L,**  
1074 **Ding S-W, Guo H-S. 2016.** Cotton plants export microRNAs to inhibit virulence gene  
1075 expression in a fungal pathogen. *Nature Plants* **2**: 16153.
- 1076
- 1077 **Supporting Information**
- 1078 Figure S1. Alignment of *C. orbiculare* SRNs
- 1079 Figure S2. SRNs expressed in *N. benthamiana* with the pEAQ binary vector
- 1080 Figure S3. Establishment of the *Agrobacterium*-mediated transient gene expression  
1081 system in *C. sativus*
- 1082 Figure S4. Oxidative bursts are elicited by chitin on *C. sativus* cotyledons
- 1083 Figure S5. The two predicted glycosylation sites in SRN2 are not involved in the  
1084 potentiation of chitin-triggered ROS bursts
- 1085 Figure S6. Assessment of PTI marker gene candidates in *C. sativus*
- 1086 Figure S7. SRN1 does not cleave dsRNAs
- 1087 Figure S8. Phenotype of *N. benthamiana* expressing SRN2 mutant proteins
- 1088 Table S1. List of *Colletotrichum orbiculare* conserved effector candidates
- 1089 Table S2. List of 32 fungal genomes
- 1090 Table S3. Plasmid list
- 1091 Table S4. DNA oligonucleotide list
- 1092 Table S5. Fungal strain list
- 1093 Table S6. Accession numbers of *SRN* genes
- 1094 Table S7. Number of *SRN* genes in *Colletotrichum* species
- 1095 Method S1. Plasmid construction
- 1096 Method S2. Fungal transformation
- 1097 Method S3. Fungal inoculation



- 1098 Method S4. Immunoblotting
- 1099 Method S5. Recombinant protein expression and purification
- 1100 Method S6. Linker ligation of RNAs
